# Supplementary material for: Update on the Neisseria Macrophage Infectivity Potentiator-Like PPIase Protein
Source: Front Cell Infect Microbiol. 2022 Mar 22;12:861489. doi: 10.3389/fcimb.2022.861489 (PMC8981591; doi:10.3389/fcimb.2022.861489)
Supplement: Supplementary file 6 [file Table_3.xlsx]

## Sheet: Export
Supplementary Dataset 3. Analysis of NEIS1487 in Neisseria meningitidis isolates in the PubMLST Neisseria database
id	isolate	species	serogroup	NEIS1487		Allele Number			Allele Number		% of isolates
51598	14.8700178	Neisseria meningitidis	B	0		1	7397		1	7397	27.4563			non-redundant alleles	no isolates % isolates
314	D1	Neisseria meningitidis	C	1		2	1994		12	5804	21.5434			15	1	0.00371181
343	500	Neisseria meningitidis	C	1		3	1		4	2184	8.1066			9	2	0.00742363
349	38VI	Neisseria meningitidis	B	1		4	2184		68	2025	7.51642			58	1	0.00371181
644	L93/4286	Neisseria meningitidis	C	1		5	286		2	1994	7.40136			658	1	0.00371181
655	E32	Neisseria meningitidis	Z	1		6	476		14	1580	5.86467			374	1	0.00371181
659	A22	Neisseria meningitidis	W	1		7	511		13	1002	3.71924			541	1	0.00371181
662	2837	Neisseria meningitidis	C	1		8	0		31	884	3.28124			687	1	0.00371181
665	2845	Neisseria meningitidis	C	1		9	2		7	511	1.89674			324	1	0.00371181
669	2846	Neisseria meningitidis	C	1		10	3		22	508	1.8856			262	1	0.00371181
670	2840	Neisseria meningitidis	C	1		11	28		26	503	1.86704			116	13	0.0482536
671	2844	Neisseria meningitidis	C	1		12	5804		6	476	1.76682			295	1	0.00371181
672	2847	Neisseria meningitidis	C	1		13	1002		63	359	1.33254			141	13	0.0482536
684	0259/93	Neisseria meningitidis	C	1		14	1580		5	286	1.06158			132.145.244	7	0.0259827
698	FAM18	Neisseria meningitidis	C	1		15	1		25	137	0.508519			13.26.76.151.277.298.373.454.492.495.515.724.730	1522	5.64938
872	OX9930042	Neisseria meningitidis	E	1		16	0		23	115	0.426859			356	1	0.00371181
880	OX9930126	Neisseria meningitidis	B	1		17	0		127	92	0.341487			500	3	0.0111354
883	OX9930142	Neisseria meningitidis	B	1		18	0		57	73	0.270962			653	1	0.00371181
889	OX9930386	Neisseria meningitidis	NG	1		19	0		69	67	0.248692			323	1	0.00371181
901	OX9930804	Neisseria meningitidis	NG	1		20	0		169	59	0.218997			96	1	0.00371181
902	OX9930817	Neisseria meningitidis	W	1		21	0		70	36	0.133625			257	1	0.00371181
903	OX9930872	Neisseria meningitidis	W	1		22	508		314	29	0.107643			399	1	0.00371181
909	OX9931067	Neisseria meningitidis	W	1		23	115		11	28	0.103931			94.247.506	7	0.0259827
915	OX9931754	Neisseria meningitidis	W	1		24	1		107	25	0.0927954			2.4.12.14.25.62.73.93.97.98.99.104.118.123.124.129.150.153.156.165.167.170.171.181.183.186.192.193.194.224.232.237.239.241.242.243.245.258.261.263.264.268.286.296.300.311.312.314.352.361.364.377.400.433.437.449.460.464.470.481.485.493.501.516.518.523.524.531.534.543.544.573.582.607.620.636.639.675.683.689.709.725.731.1/4	11912	44.2151
916	OX9931909	Neisseria meningitidis	NG	1		25	137		194	24	0.0890836			528	1	0.00371181
939	0022/93	Neisseria meningitidis	C	1		26	503		302	23	0.0853717			405	1	0.00371181
940	0023/93	Neisseria meningitidis	C	1		27	3		109	19	0.0705245			622	1	0.00371181
942	0025/93	Neisseria meningitidis	C	1		28	0		67	18	0.0668127			299	1	0.00371181
946	0033/93	Neisseria meningitidis	C	1		29	0		73	18	0.0668127			688	1	0.00371181
948	0035/93	Neisseria meningitidis	C	1		30	2		121	14	0.0519654			321	1	0.00371181
949	0036/93	Neisseria meningitidis	C	1		31	884		116	13	0.0482536			147	1	0.00371181
950	0037/93	Neisseria meningitidis	C	1		32	12		141	13	0.0482536			716	1	0.00371181
952	0039/93	Neisseria meningitidis	C	1		33	0		32	12	0.0445418			655	2	0.00742363
954	0042/93	Neisseria meningitidis	C	1		34	0		66	12	0.0445418			570	1	0.00371181
955	0043/93	Neisseria meningitidis	C	1		35	3		149	12	0.0445418			483	1	0.00371181
957	0045/93	Neisseria meningitidis	C	1		36	0		469	11	0.04083			438	2	0.00742363
958	0046/93	Neisseria meningitidis	C	1		37	0		93	9	0.0334063			406	1	0.00371181
964	0057/93	Neisseria meningitidis	B	1		38	0		437	9	0.0334063			396	1	0.00371181
965	0058/93	Neisseria meningitidis	B	1		39	0		110	8	0.0296945			331	1	0.00371181
978	0073/93	Neisseria meningitidis	C	1		40	0		312	8	0.0296945			729	1	0.00371181
979	0074/93	Neisseria meningitidis	C	1		41	0		368	8	0.0296945			726	1	0.00371181
982	0079/93	Neisseria meningitidis	C	1		42	0		161	7	0.0259827			148	2	0.00742363
992	0093/93	Neisseria meningitidis	C	1		43	0		216	7	0.0259827			365	2	0.00742363
993	0095/93	Neisseria meningitidis	C	1		44	0		303	7	0.0259827			540	1	0.00371181
994	0096/93	Neisseria meningitidis	C	1		45	0		366	7	0.0259827			572	1	0.00371181
1038	8013	Neisseria meningitidis	C	1		46	0		543	7	0.0259827			109	19	0.0705245
1169	BM45	Neisseria meningitidis	C	1		47	0		623	7	0.0259827			146	1	0.00371181
1170	BM45a	Neisseria meningitidis	C	1		48	0		111	6	0.0222709			216.497.667	9	0.0334063
1178	W72	Neisseria meningitidis	C	1		49	0		154	6	0.0222709			290	1	0.00371181
1179	W72a	Neisseria meningitidis	C	1		50	0		197	6	0.0222709			320	3	0.0111354
1180	W72b	Neisseria meningitidis	C	1		51	0		439	6	0.0222709			371	1	0.00371181
1181	W138	Neisseria meningitidis	B	1		52	0		105	5	0.0185591			502	3	0.0111354
1212	0099/93	Neisseria meningitidis	C	1		53	0		145	5	0.0185591			627	1	0.00371181
1570	0101/93	Neisseria meningitidis	NG	1		54	0		156	5	0.0185591			659	1	0.00371181
1571	0102/93	Neisseria meningitidis	C	1		55	0		180	5	0.0185591			74.95	5	0.0185591
1572	0103/93	Neisseria meningitidis	C	1		56	0		193	5	0.0185591			110.190.	11	0.04083
1573	0104/93	Neisseria meningitidis	C	1		57	73		434	5	0.0185591			112.246	4	0.0148473
1578	0109/93	Neisseria meningitidis	C	1		58	1		491	5	0.0185591			114	1	0.00371181
1582	0113/93	Neisseria meningitidis	C	1		59	0		65	4	0.0148473			155	1	0.00371181
1583	0115/93	Neisseria meningitidis	C	1		60	0		74	4	0.0148473			265	1	0.00371181
1587	0119/93	Neisseria meningitidis	C	1		61	0		94	4	0.0148473			182	2	0.00742363
1641	0254/93	Neisseria meningitidis	C	1		62	2		98	4	0.0148473			196	3	0.0111354
1650	0270/93	Neisseria meningitidis	C	1		63	359		117	4	0.0148473			494	3	0.0111354
1652	0272/93	Neisseria meningitidis	C	1		64	0		125	4	0.0148473			197	6	0.0222709
2281	M7089	Neisseria meningitidis	W	1		65	4		199	4	0.0148473			219	1	0.00371181
2290	M7124	Neisseria meningitidis	W	1		66	12		215	4	0.0148473			367	1	0.00371181
3387	OX9930084	Neisseria meningitidis	NG	1		67	18		221	4	0.0148473			370	1	0.00371181
3388	OX9930102	Neisseria meningitidis	NG	1		68	2025		264	4	0.0148473			439	6	0.0222709
3399	OX9930923	Neisseria meningitidis	W	1		69	67		277	4	0.0148473			440	1	0.00371181
3410	OX9931638	Neisseria meningitidis	Y	1		70	36		305	4	0.0148473			466	1	0.00371181
3661	OX01061392	Neisseria meningitidis	NG	1		71	0		415	4	0.0148473			480	1	0.00371181
4145	0148/00	Neisseria meningitidis	B	1		72	0		493	4	0.0148473			486	1	0.00371181
4214	OX9931620	Neisseria meningitidis	NG	1		73	18		657	4	0.0148473			498	2	0.00742363
4218	OX9930181	Neisseria meningitidis	B	1		74	4		684	4	0.0148473			507.510.	4	0.0148473
4267	OX9931781	Neisseria meningitidis	NG	1		75	1		10	3	0.0111354			517	1	0.00371181
4291	OX9930723	Neisseria meningitidis	W	1		76	1		27	3	0.0111354			521	1	0.00371181
4313	OX9931626	Neisseria meningitidis	W	1		77	0		35	3	0.0111354			554	1	0.00371181
4324	OX9931681	Neisseria meningitidis	W	1		78	0		126	3	0.0111354			571	1	0.00371181
4335	OX9932374	Neisseria meningitidis	NG	1		79	0		129	3	0.0111354			608	1	0.00371181
4377	OX9931625	Neisseria meningitidis	NG	1		80	0		190	3	0.0111354			686	1	0.00371181
6004	OX9930720	Neisseria meningitidis	NG	1		81	0		196	3	0.0111354			727	1	0.00371181
6986	0131/95	Neisseria meningitidis	B	1		82	0		238	3	0.0111354			5.115.372.452.455.514.569.609.660.	300	1.11354
7891	0179/04	Neisseria meningitidis	B	1		83	0		242	3	0.0111354			453	1	0.00371181
7892	0263/04	Neisseria meningitidis	B	1		84	0		246	3	0.0111354			535	1	0.00371181
8157	0381/93	Neisseria meningitidis	C	1		85	0		320	3	0.0111354			125.426	5	0.0185591
8159	0383/93	Neisseria meningitidis	C	1		86	0		381	3	0.0111354			152	1	0.00371181
8682	0030/01	Neisseria meningitidis	B	1		87	0		449	3	0.0111354			415.723	5	0.0185591
9756	275	Neisseria meningitidis	W	1		88	1		455	3	0.0111354			240	1	0.00371181
10436	0290/94	Neisseria meningitidis	W	1		89	0		458	3	0.0111354			11.122	29	0.107643
10479	0233/96	Neisseria meningitidis	B	1		90	0		465	3	0.0111354			3	1	0.00371181
10487	0288/96	Neisseria meningitidis	B	1		91	0		488	3	0.0111354			628	1	0.00371181
10499	0467/96	Neisseria meningitidis	B	1		92	0		492	3	0.0111354			63.444.404	361	1.33997
10500	0492/96	Neisseria meningitidis	B	1		93	9		494	3	0.0111354			568	1	0.00371181
13420	0106/07	Neisseria meningitidis	B	1		94	4		500	3	0.0111354			66.69.475	80	0.296945
14596	OX9932139	Neisseria meningitidis	NG	1		95	1		502	3	0.0111354			512	1	0.00371181
14765	0002/93	Neisseria meningitidis	C	1		96	1		510	3	0.0111354			179	2	0.00742363
15032	0186/93	Neisseria meningitidis	C	1		97	2		514	3	0.0111354			22.57.117.126.149.187.233.238.248.341.368.381.637.641.652.31.32.65.67.70.111.121.168.221.305.407.491.728.738.740	1615	5.99458
15035	0188/93	Neisseria meningitidis	C	1		98	4		675	3	0.0111354			625	2	0.00742363
15152	0263/93	Neisseria meningitidis	B	1		99	1		9	2	0.00742363			736	1	0.00371181
15154	0264/93	Neisseria meningitidis	C	1		100	0		30	2	0.00742363			654	1	0.00371181
15174	0284/93	Neisseria meningitidis	C	1		101	0		62	2	0.00742363			441	1	0.00371181
15176	0287/93	Neisseria meningitidis	C	1		102	0		97	2	0.00742363			294	1	0.00371181
15238	0343/93	Neisseria meningitidis	C	1		103	0		104	2	0.00742363			157	1	0.00371181
15261	0400/93	Neisseria meningitidis	C	1		104	2		108	2	0.00742363			435	1	0.00371181
15315	0489/93	Neisseria meningitidis	C	1		105	5		115	2	0.00742363			630	1	0.00371181
15316	0490/93	Neisseria meningitidis	C	1		106	1		124	2	0.00742363			301	1	0.00371181
15319	0500/93	Neisseria meningitidis	C	1		107	25		148	2	0.00742363			685	1	0.00371181
15325	0512/93	Neisseria meningitidis	C	1		108	2		171	2	0.00742363			7.68.75.169.180.220.285.423.574.600.623.650.7/12	2616	9.71011
15330	0520/93	Neisseria meningitidis	C	1		109	19		179	2	0.00742363			545	1	0.00371181
15336	0529/93	Neisseria meningitidis	C	1		110	8		182	2	0.00742363			266	1	0.00371181
15342	0535/93	Neisseria meningitidis	C	1		111	6		183	2	0.00742363			465.527.567	5	0.0185591
15344	0538/93	Neisseria meningitidis	C	1		112	1		195	2	0.00742363			710	1	0.00371181
15623	0091/04	Neisseria meningitidis	B	1		113	1		217	2	0.00742363			1.108.154.158.161.172.185.195.198.199.223.267.284.303.354.369.375.450.458.459.463.469.478.488.499.509.525.548.591.629.640.741.743.434.	7471	27.731
15630	0140/04	Neisseria meningitidis	B	1		114	1		223	2	0.00742363			708	2	0.00742363
17191	18581	Neisseria meningitidis	W	1		115	2		224	2	0.00742363			526	1	0.00371181
17192	19121	Neisseria meningitidis	W	1		116	13		229	2	0.00742363			680	1	0.00371181
17193	19226	Neisseria meningitidis	W	1		117	4		241	2	0.00742363			657	4	0.0148473
17194	19650	Neisseria meningitidis	W	1		118	1		247	2	0.00742363			589	1	0.00371181
17195	19678	Neisseria meningitidis	W	1		119	0		263	2	0.00742363			490	1	0.00371181
17196	19679	Neisseria meningitidis	W	1		120	0		285	2	0.00742363			419	1	0.00371181
17197	19680	Neisseria meningitidis	W	1		121	14		287	2	0.00742363			366	7	0.0259827
18738	0082/11	Neisseria meningitidis	B	1		122	1		311	2	0.00742363			287	2	0.00742363
19030	M10 240489	Neisseria meningitidis	B	1		123	1		321	2	0.00742363			259	1	0.00371181
19358	M6190	Neisseria meningitidis		1		124	2		352	2	0.00742363			215	4	0.0148473
19361	ES14902	Neisseria meningitidis		1		125	4		365	2	0.00742363			189	1	0.00371181
19365	K1207	Neisseria meningitidis	C	1		126	3		372	2	0.00742363			166.302	24	0.0890836
19505	S0108	Neisseria meningitidis	C	1		127	92		373	2	0.00742363			106	1	0.00371181
19763	LNP26037	Neisseria meningitidis	B	1		128	1		438	2	0.00742363			105	5	0.0185591
19957	M00 241317	Neisseria meningitidis	W	1		129	3		498	2	0.00742363			638	2	0.00742363
19968	M10 240514	Neisseria meningitidis	W	1		130	1		509	2	0.00742363			217	2	0.00742363
20057	M10 240671	Neisseria meningitidis	W	1		131	0		511	2	0.00742363			222	1	0.00371181
20066	M10 240684	Neisseria meningitidis	B	1		132	1		518	2	0.00742363			188	1	0.00371181
20086	M10 240716	Neisseria meningitidis	B	1		133	0		519	2	0.00742363			553	1	0.00371181
20101	M10 240737	Neisseria meningitidis	W	1		134	0		625	2	0.00742363			604	1	0.00371181
20114	M10 240756	Neisseria meningitidis	W	1		135	0		638	2	0.00742363			130	1	0.00371181
20154	M10 240817	Neisseria meningitidis	W	1		136	0		655	2	0.00742363			549	1	0.00371181
20155	M10 240818	Neisseria meningitidis	C	1		137	0		708	2	0.00742363			107.127	117	0.434282
20158	M10 240821	Neisseria meningitidis	W	1		138	0		728	2	0.00742363			359	1	0.00371181
20159	M10 240822	Neisseria meningitidis	W	1		139	0		740	2	0.00742363			6.23.30.128.218.436.496.511.519.532.684	606	2.24936
20165	M11 240001	Neisseria meningitidis	B	1		140	0		3	1	0.00371181			322	1	0.00371181
20191	M11 240029	Neisseria meningitidis	W	1		141	13		15	1	0.00371181			24	1	0.00371181
20196	M11 240035	Neisseria meningitidis	W	1		142	0		24	1	0.00371181			10	3	0.0111354
20203	M11 240042	Neisseria meningitidis	B	1		143	0		58	1	0.00371181			35	3	0.0111354
20211	M11 240052	Neisseria meningitidis	B	1		144	0		75	1	0.00371181			113	1	0.00371181
20215	M11 240056	Neisseria meningitidis	B	1		145	5		76	1	0.00371181			229	2	0.00742363
20216	M11 240057	Neisseria meningitidis	W	1		146	1		88	1	0.00371181			717	1	0.00371181
20226	M11 240067	Neisseria meningitidis	W	1		147	1		95	1	0.00371181			319	1	0.00371181
20234	M11 240076	Neisseria meningitidis	C	1		148	2		96	1	0.00371181			27.656	4	0.0148473
20239	M11 240083	Neisseria meningitidis	B	1		149	12		99	1	0.00371181			88	1	0.00371181
20247	M11 240099	Neisseria meningitidis	W	1		150	1		106	1	0.00371181			529	1	0.00371181
20288	M11 240168	Neisseria meningitidis	W	1		151	1		112	1	0.00371181				26941	100
20306	M11 240206	Neisseria meningitidis	B	1		152	1		113	1	0.00371181
20313	M11 240214	Neisseria meningitidis	B	1		153	1		114	1	0.00371181
20318	M11 240231	Neisseria meningitidis	W	1		154	6		118	1	0.00371181
20329	M11 240247	Neisseria meningitidis	C	1		155	1		122	1	0.00371181
20337	M11 240261	Neisseria meningitidis	W	1		156	5		123	1	0.00371181
20359	M11 240294	Neisseria meningitidis	C	1		157	1		128	1	0.00371181
20365	M11 240302	Neisseria meningitidis	W	1		158	1		130	1	0.00371181
20368	M11 240305	Neisseria meningitidis	W	1		159	0		132	1	0.00371181
20399	M11 240349	Neisseria meningitidis	W	1		160	0		146	1	0.00371181
20422	M11 240387	Neisseria meningitidis	W	1		161	7		147	1	0.00371181
20424	M11 240389	Neisseria meningitidis	W	1		162	0		150	1	0.00371181
20436	M11 240403	Neisseria meningitidis	W	1		163	0		151	1	0.00371181
20444	M11 240417	Neisseria meningitidis	W	1		164	0		152	1	0.00371181
20449	M11 240427	Neisseria meningitidis	W	1		165	1		153	1	0.00371181
20460	M12 240156	Neisseria meningitidis	W	1		166	1		155	1	0.00371181
20461	M12 240160	Neisseria meningitidis	W	1		167	1		157	1	0.00371181
20462	M12 240196	Neisseria meningitidis	W	1		168	1		158	1	0.00371181
20564	Nm6938	Neisseria meningitidis	W	1		169	59		165	1	0.00371181
20565	Nm2732	Neisseria meningitidis	W	1		170	1		166	1	0.00371181
20683	M23701	Neisseria meningitidis		1		171	2		167	1	0.00371181
20686	M23804	Neisseria meningitidis		1		172	1		168	1	0.00371181
20753	M09 240242	Neisseria meningitidis		1		173	0		170	1	0.00371181
20793	M10 240140	Neisseria meningitidis		1		174	0		172	1	0.00371181
20888	PM6TS	Neisseria meningitidis		1		175	0		181	1	0.00371181
20889	PM6B	Neisseria meningitidis		1		176	0		185	1	0.00371181
20903	PM27TS	Neisseria meningitidis		1		177	0		186	1	0.00371181
20904	PM27B	Neisseria meningitidis		1		178	0		187	1	0.00371181
21092	M11 240443	Neisseria meningitidis	B	1		179	2		188	1	0.00371181
21110	M11 240469	Neisseria meningitidis	B	1		180	5		189	1	0.00371181
21123	M11 240486	Neisseria meningitidis	W	1		181	1		192	1	0.00371181
21132	M11 240497	Neisseria meningitidis	W	1		182	2		198	1	0.00371181
21134	M11 240502	Neisseria meningitidis	C	1		183	2		218	1	0.00371181
21139	M11 240508	Neisseria meningitidis	W	1		184	0		219	1	0.00371181
21156	M11 240716	Neisseria meningitidis	W	1		185	1		220	1	0.00371181
21163	M11 240726	Neisseria meningitidis	W	1		186	1		222	1	0.00371181
21175	M11 240741	Neisseria meningitidis	W	1		187	1		232	1	0.00371181
21196	M11 240785	Neisseria meningitidis	C	1		188	1		233	1	0.00371181
21203	M11 240798	Neisseria meningitidis	W	1		189	1		237	1	0.00371181
21206	M11 240802	Neisseria meningitidis	W	1		190	3		239	1	0.00371181
21208	M11 240941	Neisseria meningitidis	C	1		191	0		240	1	0.00371181
21214	M11 240953	Neisseria meningitidis	W	1		192	1		243	1	0.00371181
21216	M11 240975	Neisseria meningitidis	W	1		193	5		244	1	0.00371181
21228	M11 240988	Neisseria meningitidis	B	1		194	24		245	1	0.00371181
21232	M11 240994	Neisseria meningitidis	C	1		195	2		248	1	0.00371181
21237	M11 241016	Neisseria meningitidis	B	1		196	3		257	1	0.00371181
21246	M11 241031	Neisseria meningitidis	B	1		197	6		258	1	0.00371181
21253	M11 241039	Neisseria meningitidis	C	1		198	1		259	1	0.00371181
21256	M11 241043	Neisseria meningitidis	C	1		199	4		261	1	0.00371181
21288	M12 240004	Neisseria meningitidis	W	1		200	0		262	1	0.00371181
21290	M12 240008	Neisseria meningitidis	W	1		201	0		265	1	0.00371181
21298	M12 240016	Neisseria meningitidis	W	1		202	0		266	1	0.00371181
21300	M12 240019	Neisseria meningitidis	B	1		203	0		267	1	0.00371181
21302	M12 240021	Neisseria meningitidis	W	1		204	0		268	1	0.00371181
21305	M12 240027	Neisseria meningitidis	W	1		205	0		284	1	0.00371181
21311	M12 240033	Neisseria meningitidis	B	1		206	0		286	1	0.00371181
21330	M12 240061	Neisseria meningitidis	B	1		207	0		290	1	0.00371181
21334	M12 240067	Neisseria meningitidis	W	1		208	0		294	1	0.00371181
21349	M12 240088	Neisseria meningitidis	W	1		209	0		295	1	0.00371181
21354	M12 240095	Neisseria meningitidis	W	1		210	0		296	1	0.00371181
21359	M12 240101	Neisseria meningitidis	C	1		211	0		298	1	0.00371181
21361	M12 240104	Neisseria meningitidis	NG	1		212	0		299	1	0.00371181
21364	M12 240111	Neisseria meningitidis	C	1		213	0		300	1	0.00371181
21371	M12 240121	Neisseria meningitidis	W	1		214	0		301	1	0.00371181
21375	M12 240125	Neisseria meningitidis	W	1		215	4		319	1	0.00371181
21377	M12 240127	Neisseria meningitidis	W	1		216	7		322	1	0.00371181
21380	M12 240132	Neisseria meningitidis	W	1		217	2		323	1	0.00371181
21381	M12 240133	Neisseria meningitidis	W	1		218	1		324	1	0.00371181
21386	M12 240144	Neisseria meningitidis	W	1		219	1		331	1	0.00371181
21407	M12 240177	Neisseria meningitidis	C	1		220	1		341	1	0.00371181
21419	M12 240202	Neisseria meningitidis	C	1		221	4		354	1	0.00371181
21446	M12 240240	Neisseria meningitidis	W	1		222	1		356	1	0.00371181
21450	M12 240245	Neisseria meningitidis	B	1		223	2		359	1	0.00371181
21454	M12 240251	Neisseria meningitidis	W	1		224	2		361	1	0.00371181
21458	M12 240255	Neisseria meningitidis	C	1		225	0		364	1	0.00371181
21492	M12 240317	Neisseria meningitidis	W	1		226	0		367	1	0.00371181
21499	M12 240324	Neisseria meningitidis	W	1		227	0		369	1	0.00371181
21571	M23162	Neisseria meningitidis	C	1		228	0		370	1	0.00371181
21573	SA_serogroup W_NM1	Neisseria meningitidis	W	1		229	2		371	1	0.00371181
21574	SA_serogroup W_NM2	Neisseria meningitidis	W	1		230	0		374	1	0.00371181
21576	SA_serogroup W_NM4	Neisseria meningitidis	W	1		231	0		375	1	0.00371181
21578	SA_serogroup W_NM6	Neisseria meningitidis	W	1		232	1		377	1	0.00371181
21581	SA_serogroup W_NM9	Neisseria meningitidis	W	1		233	1		396	1	0.00371181
21582	SA_serogroup W_NM10	Neisseria meningitidis	W	1		234	0		399	1	0.00371181
21583	SA_serogroup W_NM11	Neisseria meningitidis	W	1		235	0		400	1	0.00371181
21584	SA_serogroup W_NM12	Neisseria meningitidis	W	1		236	0		404	1	0.00371181
21587	SA_serogroup W_NM15	Neisseria meningitidis	W	1		237	1		405	1	0.00371181
21588	SA_serogroup W_NM16	Neisseria meningitidis	W	1		238	3		406	1	0.00371181
26067	959000095	Neisseria meningitidis	W	1		239	1		407	1	0.00371181
26273	BB58	Neisseria meningitidis		1		240	1		419	1	0.00371181
26275	BB242	Neisseria meningitidis		1		241	2		423	1	0.00371181
26287	V129	Neisseria meningitidis		1		242	3		426	1	0.00371181
26315	X241	Neisseria meningitidis		1		243	1		433	1	0.00371181
26332	BB111	Neisseria meningitidis		1		244	1		435	1	0.00371181
26339	BB241	Neisseria meningitidis		1		245	1		436	1	0.00371181
26370	R129	Neisseria meningitidis		1		246	3		440	1	0.00371181
26381	R210	Neisseria meningitidis		1		247	2		441	1	0.00371181
26390	BB210	Neisseria meningitidis		1		248	1		444	1	0.00371181
26432	T210	Neisseria meningitidis		1		249	0		450	1	0.00371181
26476	R58	Neisseria meningitidis		1		250	0		452	1	0.00371181
26502	BB3	Neisseria meningitidis		1		251	0		453	1	0.00371181
26512	V241	Neisseria meningitidis		1		252	0		454	1	0.00371181
26530	V210	Neisseria meningitidis		1		253	0		459	1	0.00371181
26731	M13 240559	Neisseria meningitidis	C	1		254	0		460	1	0.00371181
26732	M13 240559	Neisseria meningitidis	C	1		255	0		463	1	0.00371181
26733	LNP27256	Neisseria meningitidis	C	1		256	0		464	1	0.00371181
26821	LNP27257	Neisseria meningitidis	C	1		257	1		466	1	0.00371181
26822	LNP26948	Neisseria meningitidis	C	1		258	1		470	1	0.00371181
26824	IE10Nm25	Neisseria meningitidis	C	1		259	1		475	1	0.00371181
26839	IE11Nm05	Neisseria meningitidis	B	1		260	0		478	1	0.00371181
26841	12007_2011	Neisseria meningitidis	E	1		261	1		480	1	0.00371181
26847	12018_2011	Neisseria meningitidis	B	1		262	1		481	1	0.00371181
26859	IE11Nm29	Neisseria meningitidis	C	1		263	2		483	1	0.00371181
26860	IE11Nm30	Neisseria meningitidis	B	1		264	4		485	1	0.00371181
26888	IE12Nm29	Neisseria meningitidis	B	1		265	1		486	1	0.00371181
26898	IE13Nm02	Neisseria meningitidis	W	1		266	1		490	1	0.00371181
26899	12003_2013	Neisseria meningitidis	W	1		267	1		495	1	0.00371181
26900	IE13Nm04	Neisseria meningitidis	W	1		268	1		496	1	0.00371181
26903	IE13Nm07	Neisseria meningitidis	B	1		269	0		497	1	0.00371181
26914	IE13Nm18	Neisseria meningitidis	W	1		270	0		499	1	0.00371181
26918	10007v1	Neisseria meningitidis		1		271	0		501	1	0.00371181
26919	10117v2	Neisseria meningitidis		1		272	0		506	1	0.00371181
26920	10117v3	Neisseria meningitidis		1		273	0		507	1	0.00371181
26921	10117v4	Neisseria meningitidis		1		274	0		512	1	0.00371181
26922	10215v3	Neisseria meningitidis		1		275	0		515	1	0.00371181
26923	10215v4	Neisseria meningitidis		1		276	0		516	1	0.00371181
26924	10215v5	Neisseria meningitidis		1		277	4		517	1	0.00371181
26925	10507v4	Neisseria meningitidis		1		278	0		521	1	0.00371181
26926	10507v5	Neisseria meningitidis		1		279	0		523	1	0.00371181
26927	10551v1	Neisseria meningitidis		1		280	0		524	1	0.00371181
26928	10551v2	Neisseria meningitidis		1		281	0		525	1	0.00371181
26929	10551v3	Neisseria meningitidis		1		282	0		526	1	0.00371181
26930	10569v5	Neisseria meningitidis		1		283	0		527	1	0.00371181
26931	40118v3	Neisseria meningitidis		1		284	1		528	1	0.00371181
26932	40118v4	Neisseria meningitidis		1		285	2		529	1	0.00371181
26933	40161v1	Neisseria meningitidis		1		286	1		531	1	0.00371181
26934	40161v2	Neisseria meningitidis		1		287	2		532	1	0.00371181
26935	40161v3	Neisseria meningitidis		1		288	0		534	1	0.00371181
26936	40161v4	Neisseria meningitidis		1		289	0		535	1	0.00371181
26937	40161v5	Neisseria meningitidis		1		290	1		540	1	0.00371181
26938	60153v1	Neisseria meningitidis		1		291	0		541	1	0.00371181
26939	60153v2b	Neisseria meningitidis		1		292	0		544	1	0.00371181
26940	60153v3	Neisseria meningitidis		1		293	0		545	1	0.00371181
26941	60153v4	Neisseria meningitidis		1		294	1		548	1	0.00371181
26942	60153v5b	Neisseria meningitidis		1		295	1		549	1	0.00371181
26943	60153v6	Neisseria meningitidis		1		296	1		553	1	0.00371181
26944	70045v4b	Neisseria meningitidis		1		297	0		554	1	0.00371181
26945	70306v6	Neisseria meningitidis		1		298	1		567	1	0.00371181
26946	70322v3	Neisseria meningitidis		1		299	1		568	1	0.00371181
26947	70322v4	Neisseria meningitidis		1		300	1		569	1	0.00371181
26948	70322v5	Neisseria meningitidis		1		301	1		570	1	0.00371181
26949	80046v4b	Neisseria meningitidis		1		302	23		571	1	0.00371181
26950	80046v5	Neisseria meningitidis		1		303	7		572	1	0.00371181
26951	80046v6	Neisseria meningitidis		1		304	0		573	1	0.00371181
26952	80164v1	Neisseria meningitidis		1		305	4		574	1	0.00371181
26953	80164v2	Neisseria meningitidis		1		306	0		582	1	0.00371181
26954	80241v5	Neisseria meningitidis		1		307	0		589	1	0.00371181
26955	80305v4	Neisseria meningitidis		1		308	0		591	1	0.00371181
26956	80305v5	Neisseria meningitidis		1		309	0		600	1	0.00371181
26957	90021v3	Neisseria meningitidis		1		310	0		604	1	0.00371181
26958	90021v4	Neisseria meningitidis		1		311	2		607	1	0.00371181
26959	90022v2	Neisseria meningitidis		1		312	8		608	1	0.00371181
26960	90022v3	Neisseria meningitidis		1		313	0		609	1	0.00371181
26961	90022v4	Neisseria meningitidis		1		314	29		620	1	0.00371181
26962	90028v1	Neisseria meningitidis		1		315	0		622	1	0.00371181
26963	90034v4	Neisseria meningitidis		1		316	0		627	1	0.00371181
26964	90034v6	Neisseria meningitidis		1		317	0		628	1	0.00371181
26965	90058v2	Neisseria meningitidis		1		318	0		629	1	0.00371181
26966	90058v3	Neisseria meningitidis		1		319	1		630	1	0.00371181
26967	90058v4	Neisseria meningitidis		1		320	3		636	1	0.00371181
26968	90066v1	Neisseria meningitidis		1		321	2		637	1	0.00371181
26969	90075v3	Neisseria meningitidis		1		322	1		639	1	0.00371181
26970	90092v1	Neisseria meningitidis		1		323	1		640	1	0.00371181
26971	90092v2	Neisseria meningitidis		1		324	1		641	1	0.00371181
26972	90092v5	Neisseria meningitidis		1		325	0		650	1	0.00371181
26973	90092v6	Neisseria meningitidis		1		326	0		652	1	0.00371181
26974	90102v3	Neisseria meningitidis		1		327	0		653	1	0.00371181
26975	90102v4	Neisseria meningitidis		1		328	0		654	1	0.00371181
26978	90111v4	Neisseria meningitidis		1		329	0		656	1	0.00371181
26979	90111v5	Neisseria meningitidis		1		330	0		658	1	0.00371181
26980	90119v2	Neisseria meningitidis		1		331	1		659	1	0.00371181
26981	90119v3	Neisseria meningitidis		1		332	0		660	1	0.00371181
26982	90119v4	Neisseria meningitidis		1		333	0		667	1	0.00371181
26983	90119v5	Neisseria meningitidis		1		334	0		680	1	0.00371181
26984	90124v4	Neisseria meningitidis		1		335	0		683	1	0.00371181
26985	90130v1	Neisseria meningitidis		1		336	0		685	1	0.00371181
26986	90130v2	Neisseria meningitidis		1		337	0		686	1	0.00371181
26987	90130v5b	Neisseria meningitidis		1		338	0		687	1	0.00371181
26988	90130v6	Neisseria meningitidis		1		339	0		688	1	0.00371181
26989	90136v3	Neisseria meningitidis		1		340	0		689	1	0.00371181
26990	90136v4	Neisseria meningitidis		1		341	1		709	1	0.00371181
26991	90130v3	Neisseria meningitidis		1		342	0		710	1	0.00371181
26992	90142v1	Neisseria meningitidis		1		343	0		716	1	0.00371181
26993	90149v1	Neisseria meningitidis		1		344	0		717	1	0.00371181
26994	90174v1	Neisseria meningitidis		1		345	0		723	1	0.00371181
26995	90182v1	Neisseria meningitidis		1		346	0		724	1	0.00371181
26997	90075v2	Neisseria meningitidis		1		347	0		725	1	0.00371181
27087	LNP19995	Neisseria meningitidis	W	1		348	0		726	1	0.00371181
27089	LNP24198	Neisseria meningitidis	C	1		349	0		727	1	0.00371181
27488	B18	Neisseria meningitidis	Y	1		350	0		729	1	0.00371181
27782	M12 240347	Neisseria meningitidis	B	1		351	0		730	1	0.00371181
27788	M12 240652	Neisseria meningitidis	B	1		352	2		731	1	0.00371181
27793	M12 240659	Neisseria meningitidis	B	1		353	0		736	1	0.00371181
27803	M12 240682	Neisseria meningitidis	B	1		354	1		738	1	0.00371181
27814	M12 240704	Neisseria meningitidis	B	1		355	0		741	1	0.00371181
27849	M12 240787	Neisseria meningitidis	B	1		356	1		743	1	0.00371181
27864	M12 240819	Neisseria meningitidis	B	1		357	0		8	0	0
27871	M12 240844	Neisseria meningitidis	B	1		358	0		16	0	0
27882	M12 240865	Neisseria meningitidis	B	1		359	1		17	0	0
27887	M12 240873	Neisseria meningitidis	B	1		360	0		18	0	0
27907	M13 240006	Neisseria meningitidis	B	1		361	1		19	0	0
27914	M13 240021	Neisseria meningitidis	B	1		362	0		20	0	0
27925	M13 240042	Neisseria meningitidis	B	1		363	0		21	0	0
27927	M13 240045	Neisseria meningitidis	B	1		364	1		28	0	0
27933	M13 240057	Neisseria meningitidis	B	1		365	2		29	0	0
27934	M13 240063	Neisseria meningitidis	B	1		366	7		33	0	0
27938	M13 240074	Neisseria meningitidis	B	1		367	1		34	0	0
27941	M13 240078	Neisseria meningitidis	B	1		368	8		36	0	0
27992	M13 240199	Neisseria meningitidis	B	1		369	1		37	0	0
28017	M13 240248	Neisseria meningitidis	B	1		370	1		38	0	0
28080	M12 240639	Neisseria meningitidis	C	1		371	1		39	0	0
28082	M12 240679	Neisseria meningitidis	C	1		372	2		40	0	0
28083	M12 240698	Neisseria meningitidis	C	1		373	2		41	0	0
28084	M12 240716	Neisseria meningitidis	C	1		374	1		42	0	0
28085	M12 240776	Neisseria meningitidis	C	1		375	1		43	0	0
28089	M13 240008	Neisseria meningitidis	C	1		376	0		44	0	0
28090	M13 240022	Neisseria meningitidis	C	1		377	1		45	0	0
28092	M13 240068	Neisseria meningitidis	C	1		378	0		46	0	0
28093	M13 240155	Neisseria meningitidis	C	1		379	0		47	0	0
28094	M13 240162	Neisseria meningitidis	C	1		380	0		48	0	0
28095	M13 240189	Neisseria meningitidis	C	1		381	3		49	0	0
28097	M13 240254	Neisseria meningitidis	C	1		382	0		50	0	0
28098	M13 240280	Neisseria meningitidis	C	1		383	0		51	0	0
28099	M13 240282	Neisseria meningitidis	C	1		384	0		52	0	0
28100	M13 240295	Neisseria meningitidis	C	1		385	0		53	0	0
28102	M13 240401	Neisseria meningitidis	C	1		386	0		54	0	0
28103	M13 240402	Neisseria meningitidis	C	1		387	0		55	0	0
28104	M13 240405	Neisseria meningitidis	C	1		388	0		56	0	0
28105	M13 240440	Neisseria meningitidis	C	1		389	0		59	0	0
28106	M13 240460	Neisseria meningitidis	C	1		390	0		60	0	0
28114	M12 240337	Neisseria meningitidis	W	1		391	0		61	0	0
28115	M12 240640	Neisseria meningitidis	W	1		392	0		64	0	0
28116	M12 240657	Neisseria meningitidis	W	1		393	0		71	0	0
28117	M12 240663	Neisseria meningitidis	W	1		394	0		72	0	0
28118	M12 240671	Neisseria meningitidis	W	1		395	0		77	0	0
28119	M12 240702	Neisseria meningitidis	W	1		396	1		78	0	0
28120	M12 240734	Neisseria meningitidis	W	1		397	0		79	0	0
28121	M12 240751	Neisseria meningitidis	W	1		398	0		80	0	0
28122	M12 240754	Neisseria meningitidis	W	1		399	1		81	0	0
28123	M12 240762	Neisseria meningitidis	W	1		400	1		82	0	0
28124	M12 240772	Neisseria meningitidis	W	1		401	0		83	0	0
28125	M12 240774	Neisseria meningitidis	W	1		402	0		84	0	0
28126	M12 240789	Neisseria meningitidis	W	1		403	0		85	0	0
28127	M12 240823	Neisseria meningitidis	W	1		404	1		86	0	0
28128	M12 240826	Neisseria meningitidis	W	1		405	1		87	0	0
28129	M12 240862	Neisseria meningitidis	W	1		406	1		89	0	0
28131	M12 240895	Neisseria meningitidis	W	1		407	1		90	0	0
28132	M12 240898	Neisseria meningitidis	W	1		408	0		91	0	0
28133	M13 240013	Neisseria meningitidis	W	1		409	0		92	0	0
28134	M13 240015	Neisseria meningitidis	W	1		410	0		100	0	0
28135	M13 240025	Neisseria meningitidis	W	1		411	0		101	0	0
28136	M13 240028	Neisseria meningitidis	W	1		412	0		102	0	0
28137	M13 240056	Neisseria meningitidis	W	1		413	0		103	0	0
28138	M13 240066	Neisseria meningitidis	W	1		414	0		119	0	0
28139	M13 240077	Neisseria meningitidis	W	1		415	4		120	0	0
28140	M13 240089	Neisseria meningitidis	W	1		416	0		131	0	0
28141	M13 240109	Neisseria meningitidis	W	1		417	0		133	0	0
28142	M13 240114	Neisseria meningitidis	W	1		418	0		134	0	0
28143	M13 240158	Neisseria meningitidis	W	1		419	1		135	0	0
28144	M13 240168	Neisseria meningitidis	W	1		420	0		136	0	0
28145	M13 240176	Neisseria meningitidis	W	1		421	0		137	0	0
28146	M13 240185	Neisseria meningitidis	W	1		422	0		138	0	0
28147	M13 240223	Neisseria meningitidis	W	1		423	1		139	0	0
28148	M13 240225	Neisseria meningitidis	W	1		424	0		140	0	0
28149	M13 240238	Neisseria meningitidis	W	1		425	0		142	0	0
28150	M13 240246	Neisseria meningitidis	W	1		426	1		143	0	0
28151	M13 240247	Neisseria meningitidis	W	1		427	0		144	0	0
28152	M13 240251	Neisseria meningitidis	W	1		428	0		159	0	0
28153	M13 240269	Neisseria meningitidis	W	1		429	0		160	0	0
28154	M13 240283	Neisseria meningitidis	W	1		430	0		162	0	0
28155	M13 240431	Neisseria meningitidis	W	1		431	0		163	0	0
28156	M13 240436	Neisseria meningitidis	W	1		432	0		164	0	0
28157	M13 240446	Neisseria meningitidis	W	1		433	1		173	0	0
28158	M13 240457	Neisseria meningitidis	W	1		434	5		174	0	0
28159	M13 240464	Neisseria meningitidis	W	1		435	1		175	0	0
28160	M13 240465	Neisseria meningitidis	W	1		436	1		176	0	0
28161	M13 240467	Neisseria meningitidis	W	1		437	9		177	0	0
28162	M13 240469	Neisseria meningitidis	W	1		438	2		178	0	0
28163	M13 240473	Neisseria meningitidis	W	1		439	6		184	0	0
28164	M13 240482	Neisseria meningitidis	W	1		440	1		191	0	0
28263	N114.1	Neisseria meningitidis	E	1		441	1		200	0	0
28264	N134.1	Neisseria meningitidis		1		442	0		201	0	0
28289	N330.1	Neisseria meningitidis		1		443	0		202	0	0
28290	N333.1	Neisseria meningitidis		1		444	1		203	0	0
28937	OX01060954	Neisseria meningitidis	NG	1		445	0		204	0	0
29058	IBD-685	Neisseria meningitidis	C	1		446	0		205	0	0
29067	IBD-695	Neisseria meningitidis	W	1		447	0		206	0	0
29081	IBD-709	Neisseria meningitidis	W	1		448	0		207	0	0
29121	IBD-750	Neisseria meningitidis	C	1		449	3		208	0	0
29129	IBD-800	Neisseria meningitidis	B	1		450	1		209	0	0
29147	IBD-818	Neisseria meningitidis	B	1		451	0		210	0	0
29161	IBD-832	Neisseria meningitidis	B	1		452	1		211	0	0
29176	IBD-419	Neisseria meningitidis	W	1		453	1		212	0	0
29189	IBD-432	Neisseria meningitidis	B	1		454	1		213	0	0
29204	IBD-448	Neisseria meningitidis	B	1		455	3		214	0	0
29206	IBD-450	Neisseria meningitidis	W	1		456	0		225	0	0
29209	IBD-512	Neisseria meningitidis	C	1		457	0		226	0	0
29214	IBD-517	Neisseria meningitidis	C	1		458	3		227	0	0
29224	IBD-527	Neisseria meningitidis	C	1		459	1		228	0	0
29225	IBD-528	Neisseria meningitidis	C	1		460	1		230	0	0
29255	IBD-598	Neisseria meningitidis	C	1		461	0		231	0	0
29275	W72c	Neisseria meningitidis		1		462	0		234	0	0
29287	2666	Neisseria meningitidis	C	1		463	1		235	0	0
29305	37724	Neisseria meningitidis	C	1		464	1		236	0	0
29313	39319	Neisseria meningitidis	W	1		465	3		249	0	0
29314	39619	Neisseria meningitidis	W	1		466	1		250	0	0
29315	16661	Neisseria meningitidis	W	1		467	0		251	0	0
29316	13283	Neisseria meningitidis	W	1		468	0		252	0	0
29317	20033	Neisseria meningitidis	W	1		469	11		253	0	0
29318	40328	Neisseria meningitidis	W	1		470	1		254	0	0
29320	5453	Neisseria meningitidis	W	1		471	0		255	0	0
29321	14493	Neisseria meningitidis	W	1		472	0		256	0	0
29322	12198	Neisseria meningitidis	W	1		473	0		260	0	0
29323	37252	Neisseria meningitidis	W	1		474	0		269	0	0
29324	11361	Neisseria meningitidis	W	1		475	1		270	0	0
29325	11665	Neisseria meningitidis	W	1		476	0		271	0	0
29326	2266	Neisseria meningitidis	W	1		477	0		272	0	0
29327	14983	Neisseria meningitidis	W	1		478	1		273	0	0
29328	30301	Neisseria meningitidis	W	1		479	0		274	0	0
29329	17690	Neisseria meningitidis	W	1		480	1		275	0	0
29330	15984	Neisseria meningitidis	W	1		481	1		276	0	0
29331	4846	Neisseria meningitidis	W	1		482	0		278	0	0
29332	30147	Neisseria meningitidis	W	1		483	1		279	0	0
29333	11924	Neisseria meningitidis	W	1		484	0		280	0	0
29334	11009	Neisseria meningitidis	W	1		485	1		281	0	0
29336	29572	Neisseria meningitidis	W	1		486	1		282	0	0
29337	1356	Neisseria meningitidis	W	1		487	0		283	0	0
29338	8881	Neisseria meningitidis	W	1		488	3		288	0	0
29339	21313	Neisseria meningitidis	W	1		489	0		289	0	0
29341	10012	Neisseria meningitidis	W	1		490	1		291	0	0
29342	15736	Neisseria meningitidis	W	1		491	5		292	0	0
29344	38107	Neisseria meningitidis	W	1		492	3		293	0	0
29346	35813	Neisseria meningitidis	W	1		493	4		297	0	0
29347	24836	Neisseria meningitidis	W	1		494	3		304	0	0
29348	25348	Neisseria meningitidis	W	1		495	1		306	0	0
29349	28444	Neisseria meningitidis	W	1		496	1		307	0	0
29350	40923	Neisseria meningitidis	W	1		497	1		308	0	0
29351	5855	Neisseria meningitidis	W	1		498	2		309	0	0
29352	40932	Neisseria meningitidis	W	1		499	1		310	0	0
29355	25472	Neisseria meningitidis	W	1		500	3		313	0	0
29356	21974	Neisseria meningitidis	W	1		501	1		315	0	0
29357	15279	Neisseria meningitidis	W	1		502	3		316	0	0
29358	15512	Neisseria meningitidis	W	1		503	0		317	0	0
29359	18470	Neisseria meningitidis	W	1		504	0		318	0	0
29360	35487	Neisseria meningitidis	W	1		505	0		325	0	0
29362	10114	Neisseria meningitidis	W	1		506	1		326	0	0
29363	34709	Neisseria meningitidis	W	1		507	1		327	0	0
29364	33509	Neisseria meningitidis	W	1		508	0		328	0	0
29367	24204	Neisseria meningitidis	W	1		509	2		329	0	0
29368	31847	Neisseria meningitidis	W	1		510	3		330	0	0
29369	34873	Neisseria meningitidis	W	1		511	2		332	0	0
29370	5032	Neisseria meningitidis	W	1		512	1		333	0	0
29371	2725	Neisseria meningitidis	W	1		513	0		334	0	0
29373	36146	Neisseria meningitidis	W	1		514	3		335	0	0
29374	7764	Neisseria meningitidis	W	1		515	1		336	0	0
29375	15766	Neisseria meningitidis	W	1		516	1		337	0	0
29376	24581	Neisseria meningitidis	W	1		517	1		338	0	0
29377	14395	Neisseria meningitidis	W	1		518	2		339	0	0
29378	15781	Neisseria meningitidis	W	1		519	2		340	0	0
29379	24845	Neisseria meningitidis	W	1		520	0		342	0	0
29380	9262	Neisseria meningitidis	W	1		521	1		343	0	0
29381	16187	Neisseria meningitidis	W	1		522	0		344	0	0
29382	3390	Neisseria meningitidis	W	1		523	1		345	0	0
29383	16486	Neisseria meningitidis	W	1		524	1		346	0	0
29384	4844	Neisseria meningitidis	W	1		525	1		347	0	0
29386	28517	Neisseria meningitidis	W	1		526	1		348	0	0
29387	41003	Neisseria meningitidis	W	1		527	1		349	0	0
29388	30494	Neisseria meningitidis	W	1		528	1		350	0	0
29389	35371	Neisseria meningitidis	W	1		529	1		351	0	0
29390	37450	Neisseria meningitidis	W	1		530	0		353	0	0
29393	19208	Neisseria meningitidis	W	1		531	1		355	0	0
29395	17195	Neisseria meningitidis	W	1		532	1		357	0	0
29396	40559	Neisseria meningitidis	W	1		533	0		358	0	0
29397	7313	Neisseria meningitidis	W	1		534	1		360	0	0
29398	10093	Neisseria meningitidis	W	1		535	1		362	0	0
29399	24344	Neisseria meningitidis	W	1		536	0		363	0	0
29400	34047	Neisseria meningitidis	W	1		537	0		376	0	0
29401	3308	Neisseria meningitidis	W	1		538	0		378	0	0
29402	40498	Neisseria meningitidis	W	1		539	0		379	0	0
29403	15642	Neisseria meningitidis	W	1		540	1		380	0	0
29405	36527	Neisseria meningitidis	W	1		541	1		382	0	0
29406	15823	Neisseria meningitidis	W	1		542	0		383	0	0
29408	21822	Neisseria meningitidis	W	1		543	7		384	0	0
29409	12782	Neisseria meningitidis	W	1		544	1		385	0	0
29410	15783	Neisseria meningitidis	W	1		545	1		386	0	0
29411	16421	Neisseria meningitidis	W	1		546	0		387	0	0
29412	28319	Neisseria meningitidis	W	1		547	0		388	0	0
29413	5523	Neisseria meningitidis	W	1		548	1		389	0	0
29414	28189	Neisseria meningitidis	W	1		549	1		390	0	0
29415	17561	Neisseria meningitidis	W	1		550	0		391	0	0
29416	19923	Neisseria meningitidis	W	1		551	0		392	0	0
29417	29246	Neisseria meningitidis	W	1		552	0		393	0	0
29418	34455	Neisseria meningitidis	W	1		553	1		394	0	0
29419	13719	Neisseria meningitidis	W	1		554	1		395	0	0
29421	8373	Neisseria meningitidis	W	1		555	0		397	0	0
29422	3025	Neisseria meningitidis	W	1		556	0		398	0	0
29423	41043	Neisseria meningitidis	W	1		557	0		401	0	0
29424	15663	Neisseria meningitidis	W	1		558	0		402	0	0
29425	26790	Neisseria meningitidis	W	1		559	0		403	0	0
29426	7720	Neisseria meningitidis	W	1		560	0		408	0	0
29427	7789	Neisseria meningitidis	W	1		561	0		409	0	0
29428	33702	Neisseria meningitidis	W	1		562	0		410	0	0
29435	22774	Neisseria meningitidis	W	1		563	0		411	0	0
29436	16539	Neisseria meningitidis	A	1		564	0		412	0	0
29437	6993	Neisseria meningitidis	W	1		565	0		413	0	0
29438	14301	Neisseria meningitidis	W	1		566	0		414	0	0
29439	10803	Neisseria meningitidis	W	1		567	1		416	0	0
29453	S4	Neisseria meningitidis		1		568	1		417	0	0
29454	S4B1	Neisseria meningitidis		1		569	1		418	0	0
29455	S4B2	Neisseria meningitidis		1		570	1		420	0	0
29456	S4B3	Neisseria meningitidis		1		571	1		421	0	0
29457	S4Sm1	Neisseria meningitidis		1		572	1		422	0	0
29458	S4Sm2	Neisseria meningitidis		1		573	1		424	0	0
29459	S4Sm3	Neisseria meningitidis		1		574	1		425	0	0
29460	GRW135_strC	Neisseria meningitidis		1		575	0		427	0	0
29499	M23005	Neisseria meningitidis		1		576	0		428	0	0
29571	M04 240932	Neisseria meningitidis	C	1		577	0		429	0	0
29572	M04 240003	Neisseria meningitidis	C	1		578	0		430	0	0
29573	M04 240019	Neisseria meningitidis	C	1		579	0		431	0	0
29574	M04 240020	Neisseria meningitidis	C	1		580	0		432	0	0
29575	M04 240029	Neisseria meningitidis	C	1		581	0		442	0	0
29576	M04 240065	Neisseria meningitidis	C	1		582	1		443	0	0
29577	M04 240078	Neisseria meningitidis	C	1		583	0		445	0	0
29578	M04 240129	Neisseria meningitidis	C	1		584	0		446	0	0
29579	M04 240207	Neisseria meningitidis	C	1		585	0		447	0	0
29580	M04 240235	Neisseria meningitidis	C	1		586	0		448	0	0
29581	M04 240259	Neisseria meningitidis	C	1		587	0		451	0	0
29582	M04 240323	Neisseria meningitidis	C	1		588	0		456	0	0
29584	M04 240348	Neisseria meningitidis	C	1		589	1		457	0	0
29587	M04 240931	Neisseria meningitidis	C	1		590	0		461	0	0
29588	M04 241124	Neisseria meningitidis	C	1		591	1		462	0	0
29589	M04 241156	Neisseria meningitidis	C	1		592	0		467	0	0
29590	M04 241209	Neisseria meningitidis	C	1		593	0		468	0	0
29591	M04 241276	Neisseria meningitidis	C	1		594	0		471	0	0
29592	M04 241501	Neisseria meningitidis	C	1		595	0		472	0	0
29593	M04 241542	Neisseria meningitidis	C	1		596	0		473	0	0
29594	M04 241591	Neisseria meningitidis	C	1		597	0		474	0	0
29595	M04 241722	Neisseria meningitidis	C	1		598	0		476	0	0
29597	M05 240211	Neisseria meningitidis	C	1		599	0		477	0	0
29598	M05 240258	Neisseria meningitidis	C	1		600	1		479	0	0
29599	M05 240314	Neisseria meningitidis	C	1		601	0		482	0	0
29600	M05 240316	Neisseria meningitidis	C	1		602	0		484	0	0
29601	M05 240490	Neisseria meningitidis	C	1		603	0		487	0	0
29602	M05 240553	Neisseria meningitidis	C	1		604	1		489	0	0
29604	M05 240747	Neisseria meningitidis	C	1		605	0		503	0	0
29605	M05 240920	Neisseria meningitidis	C	1		606	0		504	0	0
29606	M05 240972	Neisseria meningitidis	C	1		607	1		505	0	0
29607	M05 240990	Neisseria meningitidis	C	1		608	1		508	0	0
29608	M05 241164	Neisseria meningitidis	C	1		609	1		513	0	0
29609	M05 241241	Neisseria meningitidis	C	1		610	0		520	0	0
29610	M05 241361	Neisseria meningitidis	C	1		611	0		522	0	0
29611	M06 240019	Neisseria meningitidis	C	1		612	0		530	0	0
29612	M06 240067	Neisseria meningitidis	C	1		613	0		533	0	0
29613	M06 240167	Neisseria meningitidis	C	1		614	0		536	0	0
29614	M06 240854	Neisseria meningitidis	C	1		615	0		537	0	0
29615	M06 240183	Neisseria meningitidis	C	1		616	0		538	0	0
29617	M06 240375	Neisseria meningitidis	C	1		617	0		539	0	0
29618	M06 240493	Neisseria meningitidis	C	1		618	0		542	0	0
29619	M06 240536	Neisseria meningitidis	C	1		619	0		546	0	0
29620	M06 240537	Neisseria meningitidis	C	1		620	1		547	0	0
29621	M06 240625	Neisseria meningitidis	C	1		621	0		550	0	0
29622	M06 240671	Neisseria meningitidis	C	1		622	1		551	0	0
29623	M06 241012	Neisseria meningitidis	C	1		623	7		552	0	0
29624	M06 240168	Neisseria meningitidis	C	1		624	0		555	0	0
29625	M07 240006	Neisseria meningitidis	C	1		625	2		556	0	0
29626	M07 240686	Neisseria meningitidis	C	1		626	0		557	0	0
29627	M07 240723	Neisseria meningitidis	C	1		627	1		558	0	0
29631	M07 241093	Neisseria meningitidis	C	1		628	1		559	0	0
29632	M07 240172	Neisseria meningitidis	C	1		629	1		560	0	0
29633	M07 240210	Neisseria meningitidis	C	1		630	1		561	0	0
29634	M07 240276	Neisseria meningitidis	C	1		631	0		562	0	0
29635	M07 240351	Neisseria meningitidis	C	1		632	0		563	0	0
29636	M07 240541	Neisseria meningitidis	C	1		633	0		564	0	0
29637	M07 240593	Neisseria meningitidis	C	1		634	0		565	0	0
29638	M08 240026	Neisseria meningitidis	C	1		635	0		566	0	0
29639	M08 240185	Neisseria meningitidis	C	1		636	1		575	0	0
29640	M08 240201	Neisseria meningitidis	C	1		637	1		576	0	0
29641	M08 240231	Neisseria meningitidis	C	1		638	2		577	0	0
29642	M08 240270	Neisseria meningitidis	C	1		639	1		578	0	0
29643	M97 253597	Neisseria meningitidis	C	1		640	1		579	0	0
29644	M98 250473	Neisseria meningitidis	C	1		641	1		580	0	0
29646	M98 253000	Neisseria meningitidis	C	1		642	0		581	0	0
29647	M98 252341	Neisseria meningitidis	NG	1		643	0		583	0	0
29648	M98 252422	Neisseria meningitidis	W	1		644	0		584	0	0
29649	M98 252412	Neisseria meningitidis	W	1		645	0		585	0	0
29650	M98 252490	Neisseria meningitidis	W	1		646	0		586	0	0
29651	M98 252407	Neisseria meningitidis	W	1		647	0		587	0	0
29652	M98 252491	Neisseria meningitidis	W	1		648	0		588	0	0
29653	M98 252431	Neisseria meningitidis	W	1		649	0		590	0	0
29654	M99 240321	Neisseria meningitidis	C	1		650	1		592	0	0
29655	M99 241273	Neisseria meningitidis	C	1		651	0		593	0	0
29656	M99 241594	Neisseria meningitidis	C	1		652	1		594	0	0
29658	M99 241667	Neisseria meningitidis	C	1		653	1		595	0	0
29659	M99 242350	Neisseria meningitidis	C	1		654	1		596	0	0
29660	M99 243338	Neisseria meningitidis	C	1		655	2		597	0	0
29661	M99 243927	Neisseria meningitidis	NG	1		656	1		598	0	0
29663	M00 240609	Neisseria meningitidis	C	1		657	4		599	0	0
29664	M00 240972	Neisseria meningitidis	C	1		658	1		601	0	0
29665	M00 241315	Neisseria meningitidis	C	1		659	1		602	0	0
29666	M00 241348	Neisseria meningitidis	C	1		660	1		603	0	0
29667	M00 241657	Neisseria meningitidis	C	1		661	0		605	0	0
29668	M00 241980	Neisseria meningitidis	C	1		662	0		606	0	0
29669	M00 242028	Neisseria meningitidis	NG	1		663	0		610	0	0
29670	M00 243009	Neisseria meningitidis	B	1		664	0		611	0	0
29671	M00 243130	Neisseria meningitidis	B	1		665	0		612	0	0
29672	M01 240219	Neisseria meningitidis	C	1		666	0		613	0	0
29673	M01 241306	Neisseria meningitidis	C	1		667	1		614	0	0
29674	M01 241431	Neisseria meningitidis	C	1		668	0		615	0	0
29676	M01 241826	Neisseria meningitidis	NG	1		669	0		616	0	0
29677	M01 242608	Neisseria meningitidis	W	1		670	0		617	0	0
29678	M01 242544	Neisseria meningitidis	NG	1		671	0		618	0	0
29679	M01 242679	Neisseria meningitidis	W	1		672	0		619	0	0
29680	M01 242591	Neisseria meningitidis	W	1		673	0		621	0	0
29681	M01 242700	Neisseria meningitidis	W	1		674	0		624	0	0
29682	M02 240026	Neisseria meningitidis	W	1		675	3		626	0	0
29683	M02 240124	Neisseria meningitidis	W	1		676	0		631	0	0
29684	M01 242717	Neisseria meningitidis	W	1		677	0		632	0	0
29685	M02 240248	Neisseria meningitidis	C	1		678	0		633	0	0
29686	M02 240227	Neisseria meningitidis	W	1		679	0		634	0	0
29687	M02 240235	Neisseria meningitidis	W	1		680	1		635	0	0
29688	M02 240422	Neisseria meningitidis	W	1		681	0		642	0	0
29689	M02 240440	Neisseria meningitidis	W	1		682	0		643	0	0
29690	M02 240609	Neisseria meningitidis	W	1		683	1		644	0	0
29692	M02 240839	Neisseria meningitidis	W	1		684	4		645	0	0
29693	M02 241029	Neisseria meningitidis	C	1		685	1		646	0	0
29694	M02 241321	Neisseria meningitidis	W	1		686	1		647	0	0
29695	M02 241603	Neisseria meningitidis	W	1		687	1		648	0	0
29696	M02 241666	Neisseria meningitidis	W	1		688	1		649	0	0
29697	M02 241746	Neisseria meningitidis	W	1		689	1		651	0	0
29698	M02 242123	Neisseria meningitidis	W	1		690	0		661	0	0
29699	M03 240692	Neisseria meningitidis	W	1		691	0		662	0	0
29700	M03 240696	Neisseria meningitidis	W	1		692	0		663	0	0
29701	M03 241647	Neisseria meningitidis	C	1		693	0		664	0	0
29702	M04 240429	Neisseria meningitidis	W	1		694	0		665	0	0
29703	M04 240435	Neisseria meningitidis	W	1		695	0		666	0	0
29704	M05 241067	Neisseria meningitidis	W	1		696	0		668	0	0
29705	M06 240459	Neisseria meningitidis	W	1		697	0		669	0	0
29706	M07 240001	Neisseria meningitidis	W	1		698	0		670	0	0
29707	M07 240118	Neisseria meningitidis	W	1		699	0		671	0	0
29708	M07 240469	Neisseria meningitidis	C	1		700	0		672	0	0
29709	M07 240774	Neisseria meningitidis	W	1		701	0		673	0	0
29710	M07 240922	Neisseria meningitidis	W	1		702	0		674	0	0
29711	M07 240489	Neisseria meningitidis	W	1		703	0		676	0	0
29712	M09 240368	Neisseria meningitidis	W	1		704	0		677	0	0
29713	M09 240316	Neisseria meningitidis	W	1		705	0		678	0	0
29714	M10 240005	Neisseria meningitidis	W	1		706	0		679	0	0
29715	M09 240862	Neisseria meningitidis	W	1		707	0		681	0	0
29716	M09 240900	Neisseria meningitidis	W	1		708	2		682	0	0
29718	M10 240389	Neisseria meningitidis	W	1		709	1		690	0	0
29719	M10 240452	Neisseria meningitidis	W	1		710	1		691	0	0
29720	M10 240696	Neisseria meningitidis	W	1		711	0		692	0	0
29721	M13 240491	Neisseria meningitidis	W	1		712	0		693	0	0
29722	M13 240530	Neisseria meningitidis	W	1		713	0		694	0	0
29723	M13 240555	Neisseria meningitidis	W	1		714	0		695	0	0
29724	M13 240591	Neisseria meningitidis	W	1		715	0		696	0	0
29725	M13 240603	Neisseria meningitidis	W	1		716	1		697	0	0
29726	M13 240604	Neisseria meningitidis	W	1		717	1		698	0	0
29727	M13 240545	Neisseria meningitidis	W	1		718	0		699	0	0
29728	M13 240558	Neisseria meningitidis	W	1		719	0		700	0	0
29729	M13 240594	Neisseria meningitidis	W	1		720	0		701	0	0
29730	M13 240583	Neisseria meningitidis	W	1		721	0		702	0	0
29731	M13 240510	Neisseria meningitidis	W	1		722	0		703	0	0
29732	M13 240633	Neisseria meningitidis	W	1		723	1		704	0	0
29733	M13 240634	Neisseria meningitidis	W	1		724	1		705	0	0
29734	M13 240538	Neisseria meningitidis	W	1		725	1		706	0	0
29735	M13 240515	Neisseria meningitidis	W	1		726	1		707	0	0
29736	M13 240600	Neisseria meningitidis	W	1		727	1		711	0	0
29737	M13 240553	Neisseria meningitidis	W	1		728	2		712	0	0
29738	PM7B	Neisseria meningitidis	C	1		729	1		713	0	0
29739	PM7CSF	Neisseria meningitidis	C	1		730	1		714	0	0
29740	PM7TS	Neisseria meningitidis	C	1		731	1		715	0	0
29750	PM8CSF	Neisseria meningitidis	C	1		732	0		718	0	0
29751	PM8NS	Neisseria meningitidis	C	1		733	0		719	0	0
29752	PM8TS	Neisseria meningitidis	C	1		734	0		720	0	0
29760	PM14CSF	Neisseria meningitidis	C	1		735	0		721	0	0
29761	PM14B	Neisseria meningitidis	C	1		736	1		722	0	0
29762	PM14TS	Neisseria meningitidis	C	1		737	0		732	0	0
29775	M00 241395	Neisseria meningitidis	W	1		738	1		733	0	0
29776	PM9TS	Neisseria meningitidis	W	1		739	0		734	0	0
29778	PM9CSF	Neisseria meningitidis	W	1		740	2		735	0	0
29781	PM10Jo	Neisseria meningitidis	C	1		741	1		737	0	0
29782	PM10B1	Neisseria meningitidis	C	1		742	0		739	0	0
29783	PM10B2	Neisseria meningitidis	C	1		743	1		742	0	0
29784	PM5B	Neisseria meningitidis	C	1		Blank	0			26941	100
29785	PM5NS1	Neisseria meningitidis	C	1		Total Strains	26941
29786	PM5NS2	Neisseria meningitidis	C	1		Total Alleles	356
29787	PM25B	Neisseria meningitidis	W	1
29788	PM25TS	Neisseria meningitidis	W	1
29789	PM11CSF	Neisseria meningitidis	C	1
29790	PM11B	Neisseria meningitidis	C	1
29791	PM11TS	Neisseria meningitidis	C	1
29813	PM12B	Neisseria meningitidis	W	1
29814	PM12TS	Neisseria meningitidis	W	1
29820	PM13B	Neisseria meningitidis	C	1
29821	PM13TS1	Neisseria meningitidis	C	1
29822	PM13TS2	Neisseria meningitidis	C	1
29831	M98 252173	Neisseria meningitidis	B	1
29832	M00 240186	Neisseria meningitidis	C	1
29833	M00 240320	Neisseria meningitidis	C	1
29834	M00 240543	Neisseria meningitidis	C	1
29835	M00 240680	Neisseria meningitidis	C	1
29836	M00 240845	Neisseria meningitidis	C	1
29837	M00 240963	Neisseria meningitidis	C	1
29838	M00 241306	Neisseria meningitidis	C	1
29840	M00 241761	Neisseria meningitidis	C	1
29841	M00 242236	Neisseria meningitidis	C	1
29842	M00 242404	Neisseria meningitidis	C	1
29843	M00 243016	Neisseria meningitidis	C	1
29846	M01 240426	Neisseria meningitidis	C	1
29847	M01 240526	Neisseria meningitidis	C	1
29849	M01 240493	Neisseria meningitidis	C	1
29850	M01 240514	Neisseria meningitidis	C	1
29851	M01 240850	Neisseria meningitidis	C	1
29853	M01 241276	Neisseria meningitidis	C	1
29855	M01 241612	Neisseria meningitidis	C	1
29857	M01 242315	Neisseria meningitidis	C	1
29858	M01 242751	Neisseria meningitidis	C	1
29859	M01 242752	Neisseria meningitidis	C	1
29860	M02 240005	Neisseria meningitidis	C	1
29861	M02 240131	Neisseria meningitidis	C	1
29862	M02 240335	Neisseria meningitidis	C	1
29863	M02 240385	Neisseria meningitidis	C	1
29864	M02 240281	Neisseria meningitidis	C	1
29865	M02 240206	Neisseria meningitidis	C	1
29867	M02 240843	Neisseria meningitidis	C	1
29868	M02 240945	Neisseria meningitidis	C	1
29869	M02 240972	Neisseria meningitidis	C	1
29870	M02 241124	Neisseria meningitidis	C	1
29871	M02 241652	Neisseria meningitidis	C	1
29873	M02 242246	Neisseria meningitidis	C	1
29875	M03 240453	Neisseria meningitidis	C	1
29876	M03 240982	Neisseria meningitidis	C	1
29877	M03 241704	Neisseria meningitidis	C	1
29878	M08 240284	Neisseria meningitidis	C	1
29879	M08 240142	Neisseria meningitidis	C	1
29880	M08 240459	Neisseria meningitidis	C	1
29881	M08 240682	Neisseria meningitidis	C	1
29882	M08 240409	Neisseria meningitidis	C	1
29883	M08 240875	Neisseria meningitidis	C	1
29884	M09 240132	Neisseria meningitidis	C	1
29885	M09 240171	Neisseria meningitidis	C	1
29886	M08 240954	Neisseria meningitidis	C	1
29887	M08 240767	Neisseria meningitidis	C	1
29888	M09 240249	Neisseria meningitidis	C	1
29890	M10 240001	Neisseria meningitidis	C	1
29891	M10 240229	Neisseria meningitidis	C	1
29892	M10 240014	Neisseria meningitidis	C	1
29893	M09 240796	Neisseria meningitidis	C	1
29894	M09 240826	Neisseria meningitidis	C	1
29895	M13 240496	Neisseria meningitidis	C	1
29897	M13 240500	Neisseria meningitidis	C	1
29898	M13 240514	Neisseria meningitidis	C	1
29899	M98 250423	Neisseria meningitidis	C	1
29900	M98 250842	Neisseria meningitidis	C	1
29901	M98 250863	Neisseria meningitidis	C	1
29902	M98 251032	Neisseria meningitidis	C	1
29903	M98 251459	Neisseria meningitidis	C	1
29904	M98 251593	Neisseria meningitidis	C	1
29905	M98 252366	Neisseria meningitidis	C	1
29906	M98 252388	Neisseria meningitidis	C	1
29908	M98 252918	Neisseria meningitidis	C	1
29909	M98 253307	Neisseria meningitidis	C	1
29910	M98 253743	Neisseria meningitidis	C	1
29911	M98 253745	Neisseria meningitidis	C	1
29912	M98 253765	Neisseria meningitidis	C	1
29913	M99 240197	Neisseria meningitidis	C	1
29914	M99 240413	Neisseria meningitidis	C	1
29915	M99 240568	Neisseria meningitidis	C	1
29916	M99 240746	Neisseria meningitidis	C	1
29917	M99 241004	Neisseria meningitidis	C	1
29918	M99 241412	Neisseria meningitidis	C	1
29919	M99 241431	Neisseria meningitidis	C	1
29920	M99 242207	Neisseria meningitidis	C	1
29921	M99 242251	Neisseria meningitidis	C	1
29922	M99 242522	Neisseria meningitidis	C	1
29923	M99 242630	Neisseria meningitidis	C	1
29924	M99 243272	Neisseria meningitidis	C	1
29925	M99 243601	Neisseria meningitidis	C	1
29927	M99 243969	Neisseria meningitidis	C	1
29928	M00 241341	Neisseria meningitidis	W	1
29929	M00 241352	Neisseria meningitidis	W	1
29930	M00 241357	Neisseria meningitidis	W	1
29931	M00 241362	Neisseria meningitidis	W	1
29932	M00 241380	Neisseria meningitidis	W	1
29933	M00 241396	Neisseria meningitidis	W	1
29934	M00 241401	Neisseria meningitidis	W	1
29935	M00 241408	Neisseria meningitidis	W	1
29936	M00 241420	Neisseria meningitidis	W	1
29937	M00 241430	Neisseria meningitidis	W	1
29938	M00 241431	Neisseria meningitidis	W	1
29939	M00 241432	Neisseria meningitidis	W	1
29940	M00 241433	Neisseria meningitidis	W	1
29941	M00 241435	Neisseria meningitidis	W	1
29942	M00 241445	Neisseria meningitidis	W	1
29943	M00 241447	Neisseria meningitidis	W	1
29944	M00 241491	Neisseria meningitidis	W	1
29945	M00 241510	Neisseria meningitidis	W	1
29946	M00 241511	Neisseria meningitidis	W	1
29947	M00 241557	Neisseria meningitidis	W	1
29948	M00 241578	Neisseria meningitidis	W	1
29949	M00 241620	Neisseria meningitidis	W	1
29950	M00 241645	Neisseria meningitidis	W	1
29951	M00 241655	Neisseria meningitidis	W	1
29952	M00 241673	Neisseria meningitidis	W	1
29953	M00 241674	Neisseria meningitidis	W	1
29954	M00 241675	Neisseria meningitidis	W	1
29955	M00 241704	Neisseria meningitidis	W	1
29956	M00 241759	Neisseria meningitidis	W	1
29957	M00 241760	Neisseria meningitidis	W	1
29958	M00 241800	Neisseria meningitidis	W	1
29959	M00 241833	Neisseria meningitidis	W	1
29960	M00 241894	Neisseria meningitidis	W	1
29961	M00 241957	Neisseria meningitidis	W	1
29962	M00 241978	Neisseria meningitidis	W	1
29963	M00 241986	Neisseria meningitidis	W	1
29964	M00 242029	Neisseria meningitidis	W	1
29965	M00 242295	Neisseria meningitidis	W	1
29966	M00 242531	Neisseria meningitidis	W	1
29967	M00 242667	Neisseria meningitidis	W	1
29968	M00 242770	Neisseria meningitidis	W	1
29969	M00 242916	Neisseria meningitidis	W	1
29970	M00 242974	Neisseria meningitidis	W	1
29971	M03 240109	Neisseria meningitidis	C	1
29972	M03 240483	Neisseria meningitidis	C	1
29973	M03 240588	Neisseria meningitidis	C	1
29974	M03 240642	Neisseria meningitidis	C	1
29975	M03 240862	Neisseria meningitidis	C	1
29976	M03 241118	Neisseria meningitidis	C	1
29977	M03 241273	Neisseria meningitidis	C	1
29978	M03 241465	Neisseria meningitidis	C	1
29979	M03 241792	Neisseria meningitidis	C	1
29980	M97 253146	Neisseria meningitidis	B	1
29981	M98 251264	Neisseria meningitidis	B	1
29982	M98 251316	Neisseria meningitidis	B	1
29983	M98 251614	Neisseria meningitidis	B	1
29984	M99 240124	Neisseria meningitidis	B	1
29985	M99 240362	Neisseria meningitidis	B	1
29986	M99 241503	Neisseria meningitidis	B	1
29988	M00 240440	Neisseria meningitidis	B	1
29989	M00 240519	Neisseria meningitidis	B	1
29990	M00 240815	Neisseria meningitidis	B	1
29991	M00 243175	Neisseria meningitidis	W	1
29992	M00 243297	Neisseria meningitidis	W	1
29993	M01 240025	Neisseria meningitidis	B	1
29994	M01 240028	Neisseria meningitidis	W	1
29995	M01 240168	Neisseria meningitidis	W	1
29996	M01 240240	Neisseria meningitidis	W	1
29997	M01 240241	Neisseria meningitidis	W	1
29998	M01 240244	Neisseria meningitidis	W	1
29999	M01 240354	Neisseria meningitidis	W	1
30000	M01 240622	Neisseria meningitidis	B	1
30001	M01 240634	Neisseria meningitidis	W	1
30002	M01 240659	Neisseria meningitidis	W	1
30003	M01 240663	Neisseria meningitidis	B	1
30004	M01 240759	Neisseria meningitidis	W	1
30005	M01 240760	Neisseria meningitidis	W	1
30006	M01 240801	Neisseria meningitidis	W	1
30007	M01 240807	Neisseria meningitidis	W	1
30008	M01 240808	Neisseria meningitidis	W	1
30009	M01 240839	Neisseria meningitidis	W	1
30010	M01 240840	Neisseria meningitidis	W	1
30011	M01 240859	Neisseria meningitidis	W	1
30012	M01 240887	Neisseria meningitidis	W	1
30013	M01 240900	Neisseria meningitidis	W	1
30014	M01 240902	Neisseria meningitidis	W	1
30015	M01 240913	Neisseria meningitidis	W	1
30016	M01 240915	Neisseria meningitidis	W	1
30017	M01 240916	Neisseria meningitidis	W	1
30018	M01 240921	Neisseria meningitidis	W	1
30019	M01 240949	Neisseria meningitidis	W	1
30020	M01 240953	Neisseria meningitidis	W	1
30021	M01 240956	Neisseria meningitidis	W	1
30022	M01 240959	Neisseria meningitidis	W	1
30023	M01 240967	Neisseria meningitidis	W	1
30024	M01 240978	Neisseria meningitidis	W	1
30025	M01 240979	Neisseria meningitidis	W	1
30026	M01 240989	Neisseria meningitidis	W	1
30027	M01 240990	Neisseria meningitidis	W	1
30028	M01 241031	Neisseria meningitidis	W	1
30029	M01 241052	Neisseria meningitidis	W	1
30030	M01 241064	Neisseria meningitidis	W	1
30031	M01 241093	Neisseria meningitidis	W	1
30032	M01 241097	Neisseria meningitidis	W	1
30033	M01 241098	Neisseria meningitidis	W	1
30034	M01 241133	Neisseria meningitidis	W	1
30035	M01 241213	Neisseria meningitidis	W	1
30036	M01 241214	Neisseria meningitidis	W	1
30037	M01 241368	Neisseria meningitidis	W	1
30038	M01 241396	Neisseria meningitidis	W	1
30039	M01 241454	Neisseria meningitidis	W	1
30040	M01 241494	Neisseria meningitidis	W	1
30041	M01 241950	Neisseria meningitidis	W	1
30042	M01 242003	Neisseria meningitidis	B	1
30043	M01 242084	Neisseria meningitidis	W	1
30047	M02 240690	Neisseria meningitidis	B	1
30048	M02 241095	Neisseria meningitidis	B	1
30049	M02 241729	Neisseria meningitidis	B	1
30050	M03 240750	Neisseria meningitidis	B	1
30051	M03 241710	Neisseria meningitidis	B	1
30052	M04 240245	Neisseria meningitidis	B	1
30053	M04 241052	Neisseria meningitidis	B	1
30054	M05 240518	Neisseria meningitidis	B	1
30055	M06 240679	Neisseria meningitidis	B	1
30056	M07 240239	Neisseria meningitidis	B	1
30058	M08 240227	Neisseria meningitidis	B	1
30059	M08 240819	Neisseria meningitidis	B	1
30060	M09 240026	Neisseria meningitidis	B	1
30061	M14 240063	Neisseria meningitidis	W	1
30064	M14 240066	Neisseria meningitidis	W	1
30065	M14 240067	Neisseria meningitidis	W	1
30066	M14 240068	Neisseria meningitidis	W	1
30067	M14 240069	Neisseria meningitidis	W	1
30069	M12 240156 b	Neisseria meningitidis	W	1
30070	M12 240160 b	Neisseria meningitidis	W	1
30071	M12 240196 b	Neisseria meningitidis	W	1
30072	M11 240099 b	Neisseria meningitidis	W	1
30073	96057	Neisseria meningitidis	W	1
30074	2001001	Neisseria meningitidis	W	1
30075	2000081	Neisseria meningitidis	W	1
30076	2000175	Neisseria meningitidis	W	1
30077	2000176	Neisseria meningitidis	W	1
30078	2002011	Neisseria meningitidis	W	1
30079	2000058	Neisseria meningitidis	W	1
30080	2001076	Neisseria meningitidis	W	1
30081	2002015	Neisseria meningitidis	W	1
30082	2002016	Neisseria meningitidis	W	1
30083	2002021	Neisseria meningitidis	W	1
30084	2002022	Neisseria meningitidis	W	1
30085	2002029	Neisseria meningitidis	W	1
30086	2001068	Neisseria meningitidis	W	1
30087	2002018	Neisseria meningitidis	W	1
30088	2002019	Neisseria meningitidis	W	1
30089	2002039	Neisseria meningitidis	W	1
30090	2002040	Neisseria meningitidis	W	1
30091	2002058	Neisseria meningitidis	W	1
30092	2002059	Neisseria meningitidis	W	1
30093	2003019	Neisseria meningitidis	W	1
30094	2003034	Neisseria meningitidis	W	1
30095	2003035	Neisseria meningitidis	W	1
30096	2003054	Neisseria meningitidis	W	1
30097	2003055	Neisseria meningitidis	W	1
30098	2004264	Neisseria meningitidis	W	1
30099	2004265	Neisseria meningitidis	W	1
30100	2004267	Neisseria meningitidis	W	1
30101	2004268	Neisseria meningitidis	W	1
30103	2001004	Neisseria meningitidis	W	1
30104	2001213	Neisseria meningitidis	W	1
30105	2001214	Neisseria meningitidis	W	1
30106	2001215	Neisseria meningitidis	W	1
30107	2001069	Neisseria meningitidis	W	1
30122	M00 241434	Neisseria meningitidis	W	1
30123	M00 241979	Neisseria meningitidis	W	1
30124	PM26B	Neisseria meningitidis	W	1
30125	PM26Jo	Neisseria meningitidis	W	1
30126	M05 240853	Neisseria meningitidis	C	1
30127	M05 240854	Neisseria meningitidis	C	1
30128	M05 240855	Neisseria meningitidis	C	1
30129	M05 240856	Neisseria meningitidis	C	1
30130	M05 240857	Neisseria meningitidis	C	1
30131	M05 240858	Neisseria meningitidis	C	1
30132	M05 240859	Neisseria meningitidis	C	1
30133	M05 240860	Neisseria meningitidis	C	1
30134	M05 240861	Neisseria meningitidis	C	1
30136	M13 240635	Neisseria meningitidis	W	1
30137	M13 240637	Neisseria meningitidis	W	1
30138	M13 240649	Neisseria meningitidis	W	1
30139	M13 240655	Neisseria meningitidis	W	1
30140	M13 240657	Neisseria meningitidis	W	1
30141	M13 240664	Neisseria meningitidis	W	1
30142	M13 240666	Neisseria meningitidis	W	1
30143	M13 240667	Neisseria meningitidis	W	1
30144	M13 240668	Neisseria meningitidis	W	1
30145	M13 240672	Neisseria meningitidis	W	1
30146	M13 240678	Neisseria meningitidis	W	1
30147	M13 240680	Neisseria meningitidis	W	1
30148	M13 240681	Neisseria meningitidis	W	1
30149	M13 240704	Neisseria meningitidis	W	1
30150	M13 240724	Neisseria meningitidis	W	1
30151	M13 240726	Neisseria meningitidis	W	1
30152	M13 240730	Neisseria meningitidis	W	1
30153	M13 240732	Neisseria meningitidis	W	1
30154	M14 240001	Neisseria meningitidis	W	1
30155	M14 240002	Neisseria meningitidis	W	1
30156	M14 240007	Neisseria meningitidis	W	1
30157	M14 240013	Neisseria meningitidis	W	1
30158	M14 240019	Neisseria meningitidis	W	1
30159	M14 240022	Neisseria meningitidis	W	1
30160	M14 240026	Neisseria meningitidis	W	1
30161	M14 240029	Neisseria meningitidis	W	1
30162	M14 240031	Neisseria meningitidis	W	1
30163	M14 240042	Neisseria meningitidis	W	1
30164	M14 240043	Neisseria meningitidis	W	1
30165	M14 240052	Neisseria meningitidis	W	1
30166	M14 240053	Neisseria meningitidis	W	1
30167	M14 240054	Neisseria meningitidis	W	1
30168	M14 240072	Neisseria meningitidis	W	1
30169	M14 240082	Neisseria meningitidis	W	1
30170	M14 240086	Neisseria meningitidis	W	1
30171	M98 252111	Neisseria meningitidis	C	1
30174	M97 250455	Neisseria meningitidis	W	1
30176	M97 251635	Neisseria meningitidis	W	1
30178	M98 250031	Neisseria meningitidis	W	1
30179	M98 251039	Neisseria meningitidis	W	1
30180	M98 251534	Neisseria meningitidis	W	1
30181	M98 253527	Neisseria meningitidis	W	1
30182	M99 240896	Neisseria meningitidis	W	1
30185	M96 255770	Neisseria meningitidis	C	1
30186	M96 255772	Neisseria meningitidis	C	1
30187	M96 255773	Neisseria meningitidis	C	1
30188	M96 255774	Neisseria meningitidis	C	1
30189	M96 255775	Neisseria meningitidis	C	1
30190	M96 255863	Neisseria meningitidis	C	1
30191	M96 255864	Neisseria meningitidis	C	1
30192	M96 255871	Neisseria meningitidis	C	1
30193	M96 255976	Neisseria meningitidis	C	1
30194	M99 240591	Neisseria meningitidis	C	1
30195	M99 240592	Neisseria meningitidis	C	1
30196	M99 240595	Neisseria meningitidis	C	1
30197	M99 240706	Neisseria meningitidis	C	1
30198	M99 240707	Neisseria meningitidis	C	1
30199	M99 240708	Neisseria meningitidis	C	1
30200	M99 240718	Neisseria meningitidis	C	1
30201	M99 240719	Neisseria meningitidis	C	1
30202	M99 240747	Neisseria meningitidis	C	1
30203	M99 240748	Neisseria meningitidis	C	1
30204	M99 240770	Neisseria meningitidis	C	1
30205	M99 240771	Neisseria meningitidis	C	1
30206	M99 240772	Neisseria meningitidis	C	1
30207	M99 240773	Neisseria meningitidis	C	1
30208	M99 240776	Neisseria meningitidis	C	1
30209	M13 240628	Neisseria meningitidis	C	1
30210	M13 240691	Neisseria meningitidis	C	1
30212	M14 240004	Neisseria meningitidis	C	1
30213	M14 240094	Neisseria meningitidis	C	1
30214	M14 240100	Neisseria meningitidis	C	1
30215	M14 240107	Neisseria meningitidis	C	1
30217	76536	Neisseria meningitidis	W	1
30220	82231	Neisseria meningitidis	W	1
30222	86276	Neisseria meningitidis	W	1
30224	M03 240641	Neisseria meningitidis	C	1
30226	M03 241190	Neisseria meningitidis	C	1
30227	M03 241322	Neisseria meningitidis	C	1
30229	M03 241630	Neisseria meningitidis	C	1
30232	M96 252550	Neisseria meningitidis	C	1
30233	M96 252591	Neisseria meningitidis	C	1
30234	M96 252316	Neisseria meningitidis	W	1
30235	M96 253521	Neisseria meningitidis	W	1
30236	M96 255203	Neisseria meningitidis	W	1
30237	M96 255688	Neisseria meningitidis	W	1
30238	M96 256246	Neisseria meningitidis	W	1
30244	F85 0000704	Neisseria meningitidis	C	1
30246	E84 000091	Neisseria meningitidis	W	1
30247	E84 000967	Neisseria meningitidis	W	1
30251	H87 000098	Neisseria meningitidis	W	1
30252	H87 002642	Neisseria meningitidis	W	1
30253	K89 000575	Neisseria meningitidis	W	1
30254	L90 001901	Neisseria meningitidis	W	1
30255	L90 002191	Neisseria meningitidis	W	1
30256	L91 000268	Neisseria meningitidis	W	1
30257	M02 242016	Neisseria meningitidis	B	1
30258	M02 242019	Neisseria meningitidis	C	1
30259	M02 242030	Neisseria meningitidis	C	1
30260	M02 242007	Neisseria meningitidis	C	1
30261	M02 242014	Neisseria meningitidis	B	1
30262	M02 242025	Neisseria meningitidis	C	1
30263	M02 242035	Neisseria meningitidis	C	1
30264	M02 242062	Neisseria meningitidis	C	1
30265	M01 242103	Neisseria meningitidis	W	1
30266	M01 242502	Neisseria meningitidis	W	1
30267	M01 242503	Neisseria meningitidis	W	1
30271	M03 241125	Neisseria meningitidis	Y	1
30274	M01 240185	Neisseria meningitidis	B	1
30276	M01 240364	Neisseria meningitidis	B	1
30283	2012 493	Neisseria meningitidis	W	1
30284	M14 240181	Neisseria meningitidis	C	1
30285	M14 240182	Neisseria meningitidis	C	1
30287	M14 240184	Neisseria meningitidis	C	1
30288	M14 240185	Neisseria meningitidis	C	1
30289	M14 240186	Neisseria meningitidis	C	1
30290	M14 240187	Neisseria meningitidis	C	1
30292	M14 240189	Neisseria meningitidis	C	1
30293	M14 240190	Neisseria meningitidis	C	1
30295	M14 240192	Neisseria meningitidis	C	1
30296	M14 240193	Neisseria meningitidis	C	1
30297	M14 240194	Neisseria meningitidis	C	1
30298	M14 240195	Neisseria meningitidis	C	1
30299	M14 240196	Neisseria meningitidis	C	1
30300	M14 240197	Neisseria meningitidis	C	1
30301	M14 240198	Neisseria meningitidis	C	1
30306	OVG_7	Neisseria meningitidis		1
30398	IBD-884	Neisseria meningitidis	W	1
30399	IBD-885	Neisseria meningitidis	W	1
30416	IBD-760	Neisseria meningitidis	C	1
30423	IBD-767	Neisseria meningitidis	B	1
30426	IBD-770	Neisseria meningitidis	W	1
30427	IBD-771	Neisseria meningitidis	C	1
30429	IBD-773	Neisseria meningitidis	B	1
30435	IBD-779	Neisseria meningitidis	C	1
30438	IBD-782	Neisseria meningitidis	C	1
30441	IBD-785	Neisseria meningitidis	W	1
30442	IBD-786	Neisseria meningitidis	C	1
30444	IBD-788	Neisseria meningitidis	W	1
30448	IBD-792	Neisseria meningitidis	B	1
30521	IBD-916	Neisseria meningitidis	W	1
30523	IBD-918	Neisseria meningitidis	C	1
30527	IBD-922	Neisseria meningitidis	C	1
30534	IBD-929	Neisseria meningitidis	W	1
30538	IBD-933	Neisseria meningitidis	C	1
30543	IBD-938	Neisseria meningitidis	C	1
30558	IBD-953	Neisseria meningitidis	C	1
30566	IBD-961	Neisseria meningitidis	C	1
30572	IBD-967	Neisseria meningitidis	B	1
30573	IBD-968	Neisseria meningitidis	C	1
30581	IBD-976	Neisseria meningitidis	C	1
30585	IBD-980	Neisseria meningitidis	C	1
30586	IBD-981	Neisseria meningitidis	C	1
30589	IBD-984	Neisseria meningitidis	B	1
30612	IBD-472	Neisseria meningitidis	C	1
30615	IBD-475	Neisseria meningitidis	C	1
30635	IBD-495	Neisseria meningitidis	B	1
30640	IBD-500	Neisseria meningitidis	B	1
30646	IBD-508	Neisseria meningitidis	C	1
30662	IBD-554	Neisseria meningitidis	B	1
30664	IBD-556	Neisseria meningitidis	C	1
30666	IBD-558	Neisseria meningitidis	C	1
30694	IE14Nm09	Neisseria meningitidis	B	1
30698	12011-14	Neisseria meningitidis	C	1
30708	IE13Nm21	Neisseria meningitidis	B	1
30712	IE13Nm24	Neisseria meningitidis	B	1
30727	12038-13	Neisseria meningitidis	C	1
30760	M14.1	Neisseria meningitidis	B	1
30881	IBD-1008	Neisseria meningitidis	C	1
30883	IBD-1010	Neisseria meningitidis	C	1
30884	IBD-1011	Neisseria meningitidis	Y	1
30896	IBD-1023	Neisseria meningitidis	C	1
30907	IBD-1034	Neisseria meningitidis	C	1
30908	IBD-1035	Neisseria meningitidis	C	1
30909	IBD-1036	Neisseria meningitidis	C	1
30918	IBD-1045	Neisseria meningitidis	C	1
30919	IBD-1046	Neisseria meningitidis	C	1
30920	IBD-1047	Neisseria meningitidis	C	1
30930	IBD-1057	Neisseria meningitidis	C	1
30931	IBD-1058	Neisseria meningitidis	W	1
30933	IBD-1060	Neisseria meningitidis	C	1
30939	IBD-1066	Neisseria meningitidis	C	1
30943	IBD-1070	Neisseria meningitidis	C	1
30947	IBD-1074	Neisseria meningitidis	W	1
30952	IBD-1079	Neisseria meningitidis	W	1
30953	IBD-1080	Neisseria meningitidis	C	1
30957	IBD-1084	Neisseria meningitidis	C	1
30959	IBD-1086	Neisseria meningitidis	C	1
30966	IBD-1130	Neisseria meningitidis	C	1
30967	IBD-1131	Neisseria meningitidis	C	1
30969	IBD-1133	Neisseria meningitidis	C	1
30970	IBD-1134	Neisseria meningitidis	C	1
30971	IBD-1135	Neisseria meningitidis	C	1
30972	IBD-1136	Neisseria meningitidis	W	1
30975	IBD-1139	Neisseria meningitidis	C	1
30976	IBD-1140	Neisseria meningitidis	C	1
30977	IBD-1141	Neisseria meningitidis	C	1
30980	IBD-1144	Neisseria meningitidis	NG	1
30984	IBD-378	Neisseria meningitidis	B	1
30987	IBD-381	Neisseria meningitidis	B	1
30990	IBD-384	Neisseria meningitidis	C	1
30997	IBD-391	Neisseria meningitidis	W	1
31012	IBD-407	Neisseria meningitidis	NG	1
31026	IBD-369	Neisseria meningitidis	C	1
31028	IBD-371	Neisseria meningitidis	C	1
31035	IBD-452	Neisseria meningitidis	C	1
31041	IBD-458	Neisseria meningitidis	C	1
31043	IBD-460	Neisseria meningitidis	C	1
31067	IBD-1093	Neisseria meningitidis	W	1
31077	IBD-1103	Neisseria meningitidis	W	1
31083	IBD-1109	Neisseria meningitidis	C	1
31091	IBD-1117	Neisseria meningitidis	C	1
31093	IBD-1119	Neisseria meningitidis	C	1
31094	IBD-1120	Neisseria meningitidis	W	1
31095	IBD-1121	Neisseria meningitidis	C	1
31106	IBD-798	Neisseria meningitidis	C	1
31107	IBD-799	Neisseria meningitidis	W	1
31148	M14 240411	Neisseria meningitidis	W	1
31149	M14 240412	Neisseria meningitidis	W	1
31150	M14 240413	Neisseria meningitidis	W	1
31151	M14 240414	Neisseria meningitidis	W	1
31152	M14 240415	Neisseria meningitidis	W	1
31155	M14 240416	Neisseria meningitidis	W	1
31156	M14 240417	Neisseria meningitidis	W	1
31157	M14 240418	Neisseria meningitidis	W	1
31158	M14 240419	Neisseria meningitidis	W	1
31159	M14 240420	Neisseria meningitidis	W	1
31161	M14 240422	Neisseria meningitidis	W	1
31162	M14 240329	Neisseria meningitidis	B	1
31164	M14 240443	Neisseria meningitidis	W	1
31165	M14 240444	Neisseria meningitidis	W	1
31166	M14 240445	Neisseria meningitidis	W	1
31167	M14 240446	Neisseria meningitidis	W	1
31168	M14 240447	Neisseria meningitidis	W	1
31169	M14 240448	Neisseria meningitidis	W	1
31179	NM8468	Neisseria meningitidis		1
31183	NM8583	Neisseria meningitidis		1
31185	NM8633	Neisseria meningitidis		1
31198	NM9954	Neisseria meningitidis	C	1
31214	LIM707	Neisseria meningitidis	C	1
31310	NM174	Neisseria meningitidis		1
31311	NM3147	Neisseria meningitidis		1
31312	2001072	Neisseria meningitidis		1
31313	2001073	Neisseria meningitidis		1
31314	2005079	Neisseria meningitidis		1
31315	2005040	Neisseria meningitidis		1
31316	2002004	Neisseria meningitidis		1
31317	NM3686	Neisseria meningitidis		1
31318	NM3682	Neisseria meningitidis		1
31319	M10208	Neisseria meningitidis		1
31320	NM3687	Neisseria meningitidis		1
31321	NM3681	Neisseria meningitidis		1
31322	M20599	Neisseria meningitidis		1
31323	M1412	Neisseria meningitidis		1
31324	M12611	Neisseria meningitidis		1
31325	NM3680	Neisseria meningitidis		1
31332	NM3683	Neisseria meningitidis		1
34512	M13 240503	Neisseria meningitidis	W	1
34540	M07 240954	Neisseria meningitidis	C	1
34541	M00 243289	Neisseria meningitidis	C	1
34543	M01 240070	Neisseria meningitidis	W	1
34544	M14 240183	Neisseria meningitidis	C	1
34545	M14 240188	Neisseria meningitidis	C	1
34546	M14 240191	Neisseria meningitidis	C	1
34571	73704	Neisseria meningitidis	C	1
34581	93004	Neisseria meningitidis		1
34595	98008	Neisseria meningitidis	E	1
34619	NM126	Neisseria meningitidis	C	1
34620	NM133	Neisseria meningitidis	C	1
34624	NM1482	Neisseria meningitidis	C	1
34625	NM1495	Neisseria meningitidis	C	1
34629	NM23	Neisseria meningitidis	C	1
34630	NM255	Neisseria meningitidis	X	1
34640	NM313	Neisseria meningitidis	C	1
34648	NM32	Neisseria meningitidis	C	1
34652	NM35	Neisseria meningitidis	C	1
34653	NM36	Neisseria meningitidis	C	1
34658	NM43	Neisseria meningitidis	C	1
34667	NM82	Neisseria meningitidis	C	1
34669	NM94	Neisseria meningitidis	C	1
34670	NM95	Neisseria meningitidis	C	1
34742	LNP27821	Neisseria meningitidis	C	1
34744	LNP27572	Neisseria meningitidis	C	1
34927	IBD-956	Neisseria meningitidis	B	1
34931	IBD-467	Neisseria meningitidis	C	1
34932	IBD-470	Neisseria meningitidis	C	1
34933	IBD-476	Neisseria meningitidis	C	1
34934	IBD-481	Neisseria meningitidis	C	1
34943	IBD-496	Neisseria meningitidis	C	1
34959	IBD-1051	Neisseria meningitidis	C	1
34960	IBD-1071	Neisseria meningitidis	C	1
34974	IBD-561	Neisseria meningitidis	C	1
34983	IBD-1102	Neisseria meningitidis	NG	1
34988	IBD-1128	Neisseria meningitidis	W	1
34989	IBD-796	Neisseria meningitidis	B	1
35077	IBD-1168	Neisseria meningitidis	C	1
35078	IBD-1169	Neisseria meningitidis	C	1
35084	IBD-1175	Neisseria meningitidis	C	1
35085	IBD-1176	Neisseria meningitidis	C	1
35086	IBD-1177	Neisseria meningitidis	C	1
35087	IBD-1178	Neisseria meningitidis	C	1
35088	IBD-1179	Neisseria meningitidis	C	1
35089	IBD-1180	Neisseria meningitidis	C	1
35090	IBD-1181	Neisseria meningitidis	C	1
35091	IBD-1182	Neisseria meningitidis	C	1
35092	IBD-1183	Neisseria meningitidis	C	1
35105	0002/15	Neisseria meningitidis	C	1
35122	0364/95	Neisseria meningitidis	B	1
35123	0448/95	Neisseria meningitidis	B	1
35124	0501/95	Neisseria meningitidis	B	1
35125	0018/99	Neisseria meningitidis	B	1
35126	0287/99	Neisseria meningitidis	B	1
35127	0010/00	Neisseria meningitidis	B	1
35128	0138/00	Neisseria meningitidis	B	1
35129	0010/01	Neisseria meningitidis	B	1
35130	0046/02	Neisseria meningitidis	B	1
35256	09.2622.N	Neisseria meningitidis	B	1
35258	09.2799.W	Neisseria meningitidis	W	1
35269	09.3351.N	Neisseria meningitidis	B	1
35283	10.2273.P	Neisseria meningitidis	W	1
35323	11.5563.G	Neisseria meningitidis	W	1
35330	12.1192.H	Neisseria meningitidis	B	1
35333	12.1555.H	Neisseria meningitidis	W	1
35345	13.2973.F	Neisseria meningitidis	B	1
35346	13.3065.D	Neisseria meningitidis	B	1
35371	12.7350.H	Neisseria meningitidis	W	1
35393	13.7214.J	Neisseria meningitidis	W	1
35397	13.8552.X	Neisseria meningitidis	W	1
35420	M14 240366	Neisseria meningitidis	W	1
35423	M13 240528	Neisseria meningitidis	W	1
35425	M13 240531	Neisseria meningitidis	W	1
35427	M13 240534	Neisseria meningitidis	B	1
35436	M13 240554	Neisseria meningitidis	B	1
35480	M13 240644	Neisseria meningitidis	B	1
35500	M13 240695	Neisseria meningitidis	B	1
35502	M13 240697	Neisseria meningitidis	B	1
35507	M13 240705	Neisseria meningitidis	W	1
35560	M14 240038	Neisseria meningitidis	W	1
35577	M14 240083	Neisseria meningitidis	B	1
35580	M14 240088	Neisseria meningitidis	B	1
35581	M14 240090	Neisseria meningitidis	W	1
35583	M14 240093	Neisseria meningitidis	B	1
35598	M14 240116	Neisseria meningitidis	W	1
35608	M14 240126	Neisseria meningitidis	W	1
35610	M14 240129	Neisseria meningitidis	W	1
35612	M14 240133	Neisseria meningitidis	B	1
35614	M14 240135	Neisseria meningitidis	W	1
35618	M14 240142	Neisseria meningitidis	W	1
35621	M14 240145	Neisseria meningitidis	W	1
35622	M14 240147	Neisseria meningitidis	W	1
35624	M14 240150	Neisseria meningitidis	W	1
35628	M14 240168	Neisseria meningitidis	C	1
35632	M14 240178	Neisseria meningitidis	W	1
35634	M14 240180	Neisseria meningitidis	W	1
35635	M14 240199	Neisseria meningitidis	W	1
35643	M14 240211	Neisseria meningitidis	W	1
35650	M14 240222	Neisseria meningitidis	C	1
35651	M14 240223	Neisseria meningitidis	W	1
35659	M14 240236	Neisseria meningitidis	C	1
35661	M14 240238	Neisseria meningitidis	W	1
35664	M14 240245	Neisseria meningitidis	W	1
35667	M14 240249	Neisseria meningitidis	B	1
35670	M14 240253	Neisseria meningitidis	W	1
35672	M14 240255	Neisseria meningitidis	C	1
35674	M14 240257	Neisseria meningitidis	W	1
35675	M14 240258	Neisseria meningitidis	W	1
35686	M14 240278	Neisseria meningitidis	W	1
35687	M14 240279	Neisseria meningitidis	W	1
35688	M14 240280	Neisseria meningitidis	C	1
35689	M14 240282	Neisseria meningitidis	W	1
35690	M14 240283	Neisseria meningitidis	W	1
35693	M14 240286	Neisseria meningitidis	C	1
35700	M14 240299	Neisseria meningitidis	W	1
35702	M14 240304	Neisseria meningitidis	W	1
35706	M14 240310	Neisseria meningitidis	C	1
35707	M14 240311	Neisseria meningitidis	C	1
35722	M14 240337	Neisseria meningitidis	W	1
35725	M14 240343	Neisseria meningitidis	W	1
35727	M14 240345	Neisseria meningitidis	B	1
35728	M14 240346	Neisseria meningitidis	W	1
35731	M14 240351	Neisseria meningitidis	W	1
35734	M14 240356	Neisseria meningitidis	B	1
35738	M14 240361	Neisseria meningitidis	W	1
35739	M14 240365	Neisseria meningitidis	B	1
35745	M14 240377	Neisseria meningitidis	W	1
35750	M14 240384	Neisseria meningitidis	B	1
35754	M14 240389	Neisseria meningitidis	W	1
35756	M14 240391	Neisseria meningitidis	W	1
35762	M14 240405	Neisseria meningitidis	C	1
35763	M14 240406	Neisseria meningitidis	W	1
35775	M14 240436	Neisseria meningitidis	C	1
35781	M14 240456	Neisseria meningitidis	B	1
35782	M14 240463	Neisseria meningitidis	W	1
35786	M14 240468	Neisseria meningitidis	W	1
35788	M14 240470	Neisseria meningitidis	W	1
35791	M14 240473	Neisseria meningitidis	W	1
35792	M14 240474	Neisseria meningitidis	W	1
35796	M14 240478	Neisseria meningitidis	W	1
35799	M14 240482	Neisseria meningitidis	W	1
35800	M14 240485	Neisseria meningitidis	W	1
35801	M14 240486	Neisseria meningitidis	W	1
35806	M14 240491	Neisseria meningitidis	W	1
35807	M14 240492	Neisseria meningitidis	W	1
35808	M14 240494	Neisseria meningitidis	W	1
35809	M14 240495	Neisseria meningitidis	W	1
35810	M14 240496	Neisseria meningitidis	W	1
35811	M14 240500	Neisseria meningitidis	W	1
35890	OX9930103	Neisseria meningitidis		1
35891	OX9930387	Neisseria meningitidis		1
35892	OX9930617	Neisseria meningitidis		1
35893	OX9930530	Neisseria meningitidis		1
35897	OX9930886	Neisseria meningitidis		1
35901	OX0050092	Neisseria meningitidis		1
35908	OX0050377	Neisseria meningitidis		1
35911	OX0050574	Neisseria meningitidis		1
35913	OX0050776	Neisseria meningitidis		1
35914	OX0050781	Neisseria meningitidis		1
35918	OX0050946	Neisseria meningitidis		1
35919	OX0050965	Neisseria meningitidis		1
35926	OX0051189	Neisseria meningitidis		1
35930	OX0051415	Neisseria meningitidis		1
35931	OX0052051	Neisseria meningitidis		1
35942	OX01060508	Neisseria meningitidis		1
35946	OX01060836	Neisseria meningitidis		1
35953	OX01061379	Neisseria meningitidis		1
35960	F1576	Neisseria meningitidis	C	1
35961	NG E28	Neisseria meningitidis	B	1
35962	NG H41	Neisseria meningitidis	B	1
35963	NG P20	Neisseria meningitidis	B	1
36131	IE15Nm04	Neisseria meningitidis	Y	1
36138	IE14Nm14	Neisseria meningitidis	W	1
36156	IE14Nm34	Neisseria meningitidis	C	1
36157	12035_2014	Neisseria meningitidis	C	1
36159	IE14Nm38	Neisseria meningitidis	B	1
36166	12045_2014	Neisseria meningitidis	NG	1
36170	12049_2009	Neisseria meningitidis	B	1
36202	BM48	Neisseria meningitidis	C	1
36203	BM48a	Neisseria meningitidis	C	1
36314	1459000516	Neisseria meningitidis	C	1
36386	2654	Neisseria meningitidis	C	1
36402	2669	Neisseria meningitidis	C	1
36444	2417	Neisseria meningitidis	C	1
36445	2418	Neisseria meningitidis	C	1
36446	2419	Neisseria meningitidis	C	1
36447	2420	Neisseria meningitidis	C	1
36448	2636	Neisseria meningitidis	C	1
36449	2639	Neisseria meningitidis	C	1
36450	2644	Neisseria meningitidis	C	1
36451	2652	Neisseria meningitidis	C	1
36452	2664	Neisseria meningitidis	C	1
36453	2665	Neisseria meningitidis	C	1
36454	1982	Neisseria meningitidis	C	1
36455	1983	Neisseria meningitidis	C	1
36456	1984	Neisseria meningitidis	C	1
36457	1985	Neisseria meningitidis	C	1
36458	1986	Neisseria meningitidis	C	1
36459	1987	Neisseria meningitidis	C	1
36460	2421	Neisseria meningitidis	C	1
36461	2560	Neisseria meningitidis	C	1
36462	1981	Neisseria meningitidis	C	1
36463	2380	Neisseria meningitidis	C	1
36464	2411	Neisseria meningitidis	C	1
36465	2387	Neisseria meningitidis	C	1
36466	2415	Neisseria meningitidis	C	1
36467	2393	Neisseria meningitidis	C	1
36468	2405	Neisseria meningitidis	C	1
36469	2433	Neisseria meningitidis	C	1
36470	2394	Neisseria meningitidis	C	1
36471	2436	Neisseria meningitidis	C	1
36472	2437	Neisseria meningitidis	C	1
36473	2444	Neisseria meningitidis	C	1
36664	EXNM394	Neisseria meningitidis	W	1
36665	EXNM612	Neisseria meningitidis	W	1
36666	EXNM652	Neisseria meningitidis	W	1
36669	11.2796.K	Neisseria meningitidis	B	1
36670	2670	Neisseria meningitidis	C	1
36673	0050/15	Neisseria meningitidis	C	1
36689	M25543	Neisseria meningitidis	W	1
36690	M23347	Neisseria meningitidis	W	1
36691	M24555	Neisseria meningitidis	W	1
36692	M25331	Neisseria meningitidis	W	1
36693	M25530	Neisseria meningitidis	W	1
36694	M26038	Neisseria meningitidis	W	1
36695	M26446	Neisseria meningitidis	W	1
36696	M26506	Neisseria meningitidis	W	1
36697	M26516	Neisseria meningitidis	W	1
36698	M27464	Neisseria meningitidis	W	1
36699	M27940	Neisseria meningitidis	W	1
36764	2506	Neisseria meningitidis	C	1
36765	2569	Neisseria meningitidis	C	1
36766	2662	Neisseria meningitidis	C	1
36767	2691	Neisseria meningitidis	C	1
36768	2690	Neisseria meningitidis	C	1
36769	2656	Neisseria meningitidis	C	1
36770	2646	Neisseria meningitidis	C	1
36771	IT2632	Neisseria meningitidis	C	1
36772	IT2625	Neisseria meningitidis	C	1
36773	IT2592	Neisseria meningitidis	C	1
36774	IT2580	Neisseria meningitidis	C	1
36775	IT2577	Neisseria meningitidis	C	1
36776	IT2576	Neisseria meningitidis	C	1
36777	IT2561	Neisseria meningitidis	C	1
36779	107507	Neisseria meningitidis	W	1
36780	107499	Neisseria meningitidis	W	1
36781	107497	Neisseria meningitidis	W	1
36782	2677	Neisseria meningitidis	C	1
36783	2640	Neisseria meningitidis	C	1
36784	2701	Neisseria meningitidis	C	1
36816	IE15Nm07	Neisseria meningitidis	B	1
36817	IE15Nm08	Neisseria meningitidis	C	1
36821	IE14Nm12	Neisseria meningitidis	C	1
36822	IE15Nm12	Neisseria meningitidis	W	1
36823	IE15Nm14	Neisseria meningitidis	C	1
36824	12015-2015	Neisseria meningitidis	W	1
36827	IE15Nm18	Neisseria meningitidis	C	1
36828	IE15Nm20	Neisseria meningitidis	C	1
36830	IE14Nm28	Neisseria meningitidis	B	1
36844	2670	Neisseria meningitidis	C	1
36845	2685	Neisseria meningitidis	W	1
36846	2692	Neisseria meningitidis	C	1
36847	2693	Neisseria meningitidis	W	1
36848	2593	Neisseria meningitidis	W	1
36849	2585	Neisseria meningitidis	W	1
36851	2157	Neisseria meningitidis	C	1
37019	2571	Neisseria meningitidis	C	1
37020	2605	Neisseria meningitidis	C	1
37593	2459	Neisseria meningitidis	C	1
37594	2493	Neisseria meningitidis	C	1
37595	2505	Neisseria meningitidis	C	1
37596	2506	Neisseria meningitidis	C	1
37597	2530	Neisseria meningitidis	C	1
37598	2531	Neisseria meningitidis	C	1
37599	2532	Neisseria meningitidis	C	1
37600	2539	Neisseria meningitidis	C	1
37601	2555	Neisseria meningitidis	C	1
37602	2603	Neisseria meningitidis	C	1
37668	M14 240229	Neisseria meningitidis	C	1
37670	M14 240394	Neisseria meningitidis	W	1
37673	M14 240502	Neisseria meningitidis	W	1
37675	M14 240504	Neisseria meningitidis	W	1
37679	M14 240509	Neisseria meningitidis	C	1
37681	M14 240511	Neisseria meningitidis	W	1
37685	M14 240517	Neisseria meningitidis	W	1
37690	M14 240522	Neisseria meningitidis	W	1
37692	M14 240524	Neisseria meningitidis	W	1
37693	M14 240525	Neisseria meningitidis	W	1
37699	M14 240532	Neisseria meningitidis	W	1
37701	M14 240534	Neisseria meningitidis	W	1
37705	M14 240541	Neisseria meningitidis	B	1
37708	M14 240545	Neisseria meningitidis	W	1
37709	M14 240546	Neisseria meningitidis	C	1
37710	M14 240548	Neisseria meningitidis	W	1
37711	M14 240550	Neisseria meningitidis	W	1
37716	M14 240555	Neisseria meningitidis	W	1
37717	M14 240556	Neisseria meningitidis	W	1
37721	M14 240561	Neisseria meningitidis	B	1
37722	M14 240562	Neisseria meningitidis	W	1
37728	M14 240568	Neisseria meningitidis	C	1
37730	M14 240572	Neisseria meningitidis	W	1
37731	M14 240573	Neisseria meningitidis	W	1
37732	M14 240574	Neisseria meningitidis	W	1
37736	M14 240581	Neisseria meningitidis	W	1
37738	M14 240585	Neisseria meningitidis	W	1
37739	M14 240587	Neisseria meningitidis	W	1
37740	M14 240590	Neisseria meningitidis	W	1
37742	M14 240593	Neisseria meningitidis	W	1
37746	M14 240601	Neisseria meningitidis	W	1
37747	M14 240602	Neisseria meningitidis	W	1
37748	M14 240604	Neisseria meningitidis	W	1
37749	M14 240605	Neisseria meningitidis	W	1
37752	M14 240616	Neisseria meningitidis	C	1
37754	M14 240618	Neisseria meningitidis	W	1
37757	M14 240621	Neisseria meningitidis	W	1
37758	M14 240622	Neisseria meningitidis	C	1
37760	M14 240624	Neisseria meningitidis	W	1
37763	M14 240627	Neisseria meningitidis	C	1
37764	M14 240628	Neisseria meningitidis	W	1
37769	M14 240633	Neisseria meningitidis	W	1
37770	M14 240634	Neisseria meningitidis	W	1
37774	M14 240638	Neisseria meningitidis	W	1
37780	M14 240645	Neisseria meningitidis	B	1
37784	M14 240649	Neisseria meningitidis	W	1
37787	M14 240652	Neisseria meningitidis	C	1
37793	M15 240005	Neisseria meningitidis	W	1
37797	M15 240010	Neisseria meningitidis	W	1
37798	M15 240011	Neisseria meningitidis	W	1
37799	M15 240012	Neisseria meningitidis	W	1
37801	M15 240015	Neisseria meningitidis	W	1
37805	M15 240021	Neisseria meningitidis	W	1
37806	M15 240022	Neisseria meningitidis	W	1
37809	M15 240027	Neisseria meningitidis	W	1
37811	M15 240029	Neisseria meningitidis	W	1
37815	M15 240035	Neisseria meningitidis	C	1
37816	M15 240036	Neisseria meningitidis	C	1
37821	M15 240041	Neisseria meningitidis	W	1
37822	M15 240042	Neisseria meningitidis	W	1
37828	M15 240048	Neisseria meningitidis	W	1
37834	M15 240055	Neisseria meningitidis	W	1
37839	M15 240060	Neisseria meningitidis	B	1
37840	M15 240061	Neisseria meningitidis	W	1
37845	M15 240066	Neisseria meningitidis	W	1
37854	M15 240078	Neisseria meningitidis	W	1
37855	M15 240079	Neisseria meningitidis	W	1
37856	M15 240080	Neisseria meningitidis	W	1
37857	M15 240081	Neisseria meningitidis	W	1
37860	M15 240085	Neisseria meningitidis	W	1
37861	M15 240089	Neisseria meningitidis	W	1
37862	M15 240091	Neisseria meningitidis	W	1
37864	M15 240095	Neisseria meningitidis	W	1
37866	M15 240097	Neisseria meningitidis	W	1
37868	M15 240099	Neisseria meningitidis	W	1
37870	M15 240101	Neisseria meningitidis	W	1
37872	M15 240103	Neisseria meningitidis	B	1
37873	M15 240105	Neisseria meningitidis	W	1
37875	M15 240107	Neisseria meningitidis	W	1
37879	M15 240112	Neisseria meningitidis	W	1
37881	M15 240114	Neisseria meningitidis	W	1
37882	M15 240115	Neisseria meningitidis	W	1
37883	M15 240116	Neisseria meningitidis	W	1
37890	M15 240127	Neisseria meningitidis	W	1
37891	M15 240128	Neisseria meningitidis	W	1
37893	M15 240130	Neisseria meningitidis	W	1
37894	M15 240131	Neisseria meningitidis	C	1
37902	M15 240141	Neisseria meningitidis	W	1
37904	M15 240144	Neisseria meningitidis	W	1
37907	M15 240148	Neisseria meningitidis	W	1
37910	M15 240151	Neisseria meningitidis	W	1
37915	M15 240158	Neisseria meningitidis	W	1
37918	M15 240161	Neisseria meningitidis	C	1
37922	M15 240172	Neisseria meningitidis	W	1
37930	M15 240181	Neisseria meningitidis	W	1
37933	M15 240185	Neisseria meningitidis	W	1
37934	M15 240187	Neisseria meningitidis	W	1
37936	M15 240189	Neisseria meningitidis	W	1
37937	M15 240190	Neisseria meningitidis	Y	1
37940	M15 240193	Neisseria meningitidis	W	1
37942	M15 240195	Neisseria meningitidis	W	1
37949	M15 240205	Neisseria meningitidis	C	1
37951	M15 240207	Neisseria meningitidis	W	1
37958	M15 240216	Neisseria meningitidis	W	1
37959	M15 240219	Neisseria meningitidis	B	1
37961	M15 240221	Neisseria meningitidis	W	1
37962	M15 240222	Neisseria meningitidis	W	1
37967	M15 240227	Neisseria meningitidis	C	1
37977	M15 240242	Neisseria meningitidis	W	1
37978	M15 240244	Neisseria meningitidis	W	1
37981	M15 240248	Neisseria meningitidis	W	1
37983	M15 240251	Neisseria meningitidis	W	1
37986	M15 240256	Neisseria meningitidis	W	1
37987	M15 240257	Neisseria meningitidis	W	1
37988	M15 240258	Neisseria meningitidis	W	1
37990	M15 240260	Neisseria meningitidis	W	1
37992	M15 240263	Neisseria meningitidis	W	1
37995	M15 240271	Neisseria meningitidis	W	1
37998	M15 240277	Neisseria meningitidis	W	1
37999	M15 240278	Neisseria meningitidis	W	1
38001	M15 240280	Neisseria meningitidis	W	1
38003	M15 240282	Neisseria meningitidis	W	1
38004	M15 240284	Neisseria meningitidis	W	1
38007	M15 240287	Neisseria meningitidis	W	1
38008	M15 240288	Neisseria meningitidis	W	1
38011	M15 240291	Neisseria meningitidis	W	1
38017	M15 240300	Neisseria meningitidis	W	1
38018	M15 240301	Neisseria meningitidis	W	1
38024	M15 240310	Neisseria meningitidis	W	1
38027	M15 240316	Neisseria meningitidis	W	1
38029	M15 240320	Neisseria meningitidis	W	1
38034	M15 240326	Neisseria meningitidis	W	1
38035	M15 240327	Neisseria meningitidis	W	1
38037	M15 240329	Neisseria meningitidis	W	1
38038	M15 240332	Neisseria meningitidis	W	1
38049	M15 240334	Neisseria meningitidis	W	1
38051	M15 240336	Neisseria meningitidis	B	1
38059	M15 240375	Neisseria meningitidis	W	1
38060	M15 240376	Neisseria meningitidis	W	1
38061	M15 240378	Neisseria meningitidis	W	1
38063	M15 240380	Neisseria meningitidis	W	1
38064	M15 240381	Neisseria meningitidis	W	1
38065	M15 240382	Neisseria meningitidis	W	1
38066	M15 240383	Neisseria meningitidis	W	1
38067	M15 240384	Neisseria meningitidis	W	1
38070	M15 240388	Neisseria meningitidis	B	1
38076	M15 240438	Neisseria meningitidis	W	1
38085	M15 240461	Neisseria meningitidis	W	1
38088	M15 240465	Neisseria meningitidis	W	1
38091	M15 240469	Neisseria meningitidis	W	1
38096	M15 240477	Neisseria meningitidis	W	1
38101	M15 240511	Neisseria meningitidis	W	1
38102	M15 240513	Neisseria meningitidis	W	1
38106	M15 240554	Neisseria meningitidis	W	1
38108	M15 240556	Neisseria meningitidis	W	1
38109	M15 240557	Neisseria meningitidis	W	1
38115	M15 240576	Neisseria meningitidis	W	1
38120	M14 240447b	Neisseria meningitidis	W	1
38121	M14 240448b	Neisseria meningitidis	W	1
38125	M13 240671	Neisseria meningitidis	B	1
38127	M14 240515	Neisseria meningitidis	W	1
38151	M15 240605	Neisseria meningitidis	W	1
38152	85Mo	Neisseria meningitidis	C	1
38153	87Mo	Neisseria meningitidis	C	1
38154	89Mo	Neisseria meningitidis	B	1
38155	90Mo	Neisseria meningitidis	C	1
38156	92Mo	Neisseria meningitidis	B	1
38159	95Mo	Neisseria meningitidis	C	1
38161	97Mo	Neisseria meningitidis	C	1
38209	EXNM619	Neisseria meningitidis	C	1
38210	EXNM616	Neisseria meningitidis	C	1
38211	EXNM606	Neisseria meningitidis	C	1
38212	EXNM607	Neisseria meningitidis	C	1
38228	107506	Neisseria meningitidis	B	1
38229	107508	Neisseria meningitidis	B	1
38233	107512	Neisseria meningitidis	W	1
38306	15.8705948	Neisseria meningitidis	W	1
38307	15.8706012	Neisseria meningitidis	W	1
38308	15.8706090	Neisseria meningitidis	W	1
38309	15.8706113	Neisseria meningitidis	W	1
38397	UNI-387	Neisseria meningitidis	B	1
38399	TRI-584	Neisseria meningitidis	NG	1
38408	UNI-854	Neisseria meningitidis	B	1
38416	EXNM658	Neisseria meningitidis	W	1
38520	M15 240722	Neisseria meningitidis	W	1
38522	M23948	Neisseria meningitidis	C	1
38543	M29047	Neisseria meningitidis	W	1
38555	M29608	Neisseria meningitidis	W	1
38565	M1057LII/13	Neisseria meningitidis	W	1
38573	M1284LII/13	Neisseria meningitidis	W	1
38600	1658_15	Neisseria meningitidis		1
38601	15-107	Neisseria meningitidis	W	1
38604	15-199	Neisseria meningitidis	W	1
38605	15-201	Neisseria meningitidis	W	1
38606	15-207	Neisseria meningitidis	W	1
38608	15-217	Neisseria meningitidis	W	1
38609	15-227	Neisseria meningitidis	W	1
38610	15-228	Neisseria meningitidis	W	1
38611	15-229	Neisseria meningitidis	W	1
38612	15-230	Neisseria meningitidis	W	1
38614	15-244	Neisseria meningitidis	W	1
38615	15-303	Neisseria meningitidis	W	1
38616	608-9901	Neisseria meningitidis	W	1
38617	90-137	Neisseria meningitidis	W	1
38618	90-7	Neisseria meningitidis	W	1
38619	90-188	Neisseria meningitidis	W	1
38620	90-410	Neisseria meningitidis	W	1
38622	590-66	Neisseria meningitidis	W	1
38690	1559000123	Neisseria meningitidis	W	1
38691	1559000163	Neisseria meningitidis	W	1
38692	15-33	Neisseria meningitidis	W	1
38694	15-71	Neisseria meningitidis	W	1
38837	2711	Neisseria meningitidis	C	1
38839	2718	Neisseria meningitidis	C	1
38840	2722	Neisseria meningitidis	C	1
38841	2723	Neisseria meningitidis	C	1
38843	2406	Neisseria meningitidis		1
38844	2413	Neisseria meningitidis		1
38845	2422	Neisseria meningitidis		1
38847	2460	Neisseria meningitidis		1
38848	2461	Neisseria meningitidis		1
38849	2462	Neisseria meningitidis		1
38850	2468	Neisseria meningitidis		1
38851	2476	Neisseria meningitidis		1
38853	2481	Neisseria meningitidis		1
38854	2482	Neisseria meningitidis		1
38855	2484	Neisseria meningitidis		1
38857	2499	Neisseria meningitidis		1
38858	2501	Neisseria meningitidis		1
38859	2504	Neisseria meningitidis		1
38860	2511	Neisseria meningitidis		1
38861	2512	Neisseria meningitidis		1
38862	2513	Neisseria meningitidis		1
38863	2527	Neisseria meningitidis		1
38864	2529	Neisseria meningitidis		1
38865	2533	Neisseria meningitidis		1
38866	2535	Neisseria meningitidis		1
38867	2541	Neisseria meningitidis		1
38869	2549	Neisseria meningitidis		1
38870	2553	Neisseria meningitidis		1
38871	2557	Neisseria meningitidis		1
38872	2568	Neisseria meningitidis		1
38873	2575	Neisseria meningitidis		1
38914	P74	Neisseria meningitidis	B	1
38933	P96	Neisseria meningitidis	B	1
38938	P101	Neisseria meningitidis	C	1
38941	P104	Neisseria meningitidis	C	1
38942	P105	Neisseria meningitidis	C	1
38983	LNP19836	Neisseria meningitidis		1
38989	0077/15	Neisseria meningitidis	W	1
38995	15.8700107	Neisseria meningitidis	W	1
38996	15.8700914	Neisseria meningitidis	W	1
38997	15.8701412	Neisseria meningitidis	W	1
38998	15.8703241	Neisseria meningitidis	W	1
38999	15.8703378	Neisseria meningitidis	W	1
39000	15.8703957	Neisseria meningitidis	W	1
39001	15.8705087	Neisseria meningitidis	W	1
39152	PE5	Neisseria meningitidis	C	1
39153	PE6	Neisseria meningitidis	C	1
39154	PE7	Neisseria meningitidis	C	1
39194	TRI-659	Neisseria meningitidis	B	1
39319	M15 240626	Neisseria meningitidis	C	1
39320	M15 240629	Neisseria meningitidis	W	1
39326	M15 240638	Neisseria meningitidis	W	1
39327	M15 240639	Neisseria meningitidis	W	1
39328	M15 240640	Neisseria meningitidis	W	1
39331	M15 240643	Neisseria meningitidis	W	1
39333	M15 240645	Neisseria meningitidis	W	1
39335	M15 240648	Neisseria meningitidis	W	1
39337	M15 240651	Neisseria meningitidis	W	1
39340	M15 240657	Neisseria meningitidis	W	1
39341	M15 240658	Neisseria meningitidis	W	1
39342	M15 240659	Neisseria meningitidis	W	1
39344	M15 240661	Neisseria meningitidis	W	1
39345	M15 240662	Neisseria meningitidis	W	1
39346	M15 240664	Neisseria meningitidis	W	1
39349	M15 240699	Neisseria meningitidis	W	1
39352	M15 240704	Neisseria meningitidis	W	1
39353	M15 240705	Neisseria meningitidis	C	1
39356	M15 240718	Neisseria meningitidis	W	1
39358	M15 240720	Neisseria meningitidis	W	1
39361	M15 240725	Neisseria meningitidis	C	1
39365	M15 240730	Neisseria meningitidis	W	1
39368	M15 240740	Neisseria meningitidis	W	1
39369	M15 240742	Neisseria meningitidis	W	1
39373	M15 240746	Neisseria meningitidis	W	1
39378	M15 240751	Neisseria meningitidis	C	1
39381	M15 240757	Neisseria meningitidis	B	1
39385	M15 240762	Neisseria meningitidis	W	1
39387	M15 240765	Neisseria meningitidis	W	1
39388	M15 240766	Neisseria meningitidis	C	1
39395	M15 240778	Neisseria meningitidis	W	1
39396	M15 240779	Neisseria meningitidis	W	1
39398	M15 240782	Neisseria meningitidis	W	1
39401	M15 240785	Neisseria meningitidis	W	1
39403	M15 240787	Neisseria meningitidis	C	1
39404	M15 240788	Neisseria meningitidis	W	1
39408	M15 240794	Neisseria meningitidis	W	1
39409	M15 240795	Neisseria meningitidis	C	1
39410	M15 240796	Neisseria meningitidis	W	1
39411	M15 240797	Neisseria meningitidis	W	1
39412	M15 240798	Neisseria meningitidis	W	1
39416	M15 240803	Neisseria meningitidis	W	1
39421	M15 240816	Neisseria meningitidis	W	1
39422	M15 240818	Neisseria meningitidis	W	1
39423	M15 240819	Neisseria meningitidis	W	1
39425	M15 240821	Neisseria meningitidis	B	1
39427	M15 240826	Neisseria meningitidis	W	1
39429	M15 240829	Neisseria meningitidis	W	1
39430	M15 240830	Neisseria meningitidis	W	1
39431	M15 240831	Neisseria meningitidis	W	1
39433	M15 240833	Neisseria meningitidis	W	1
39435	M15 240844	Neisseria meningitidis	W	1
39436	M15 240845	Neisseria meningitidis	W	1
39438	M15 240848	Neisseria meningitidis	W	1
39441	M15 240722b	Neisseria meningitidis	W	1
39447	M07 240850	Neisseria meningitidis	B	1
39569	2728	Neisseria meningitidis		1
39570	2736	Neisseria meningitidis		1
39571	PE12	Neisseria meningitidis		1
39585	LNP28208	Neisseria meningitidis	C	1
39601	17-216	Neisseria meningitidis	W	1
39602	17-219	Neisseria meningitidis	W	1
39603	17-253	Neisseria meningitidis	W	1
39608	LNP29198abd	Neisseria meningitidis	W	1
39625	M15141	Neisseria meningitidis	C	1
39628	82-15	Neisseria meningitidis	W	1
39629	83-15	Neisseria meningitidis	W	1
39630	111-15	Neisseria meningitidis	W	1
39632	171-15	Neisseria meningitidis	W	1
39633	179-15	Neisseria meningitidis	W	1
39634	583-15	Neisseria meningitidis	W	1
39638	666-15	Neisseria meningitidis	W	1
39641	1010-15	Neisseria meningitidis	W	1
39645	1064-15	Neisseria meningitidis	W	1
39647	1082-15	Neisseria meningitidis	W	1
39649	1083-15	Neisseria meningitidis	W	1
39650	1090-15	Neisseria meningitidis	W	1
39651	1096-15	Neisseria meningitidis	W	1
39775	1658-15	Neisseria meningitidis	W	1
39781	1847-15	Neisseria meningitidis	W	1
39791	2029-15	Neisseria meningitidis	W	1
39795	2099-15	Neisseria meningitidis	W	1
39797	2143-15	Neisseria meningitidis	W	1
39798	2146-15	Neisseria meningitidis	W	1
39812	2749-15	Neisseria meningitidis	W	1
39827	3833-15	Neisseria meningitidis	W	1
39844	M22236	Neisseria meningitidis	C	1
39845	M03564	Neisseria meningitidis	C	1
39846	M05451	Neisseria meningitidis	C	1
39847	M05831	Neisseria meningitidis	C	1
39849	M05731	Neisseria meningitidis	C	1
39850	M05732	Neisseria meningitidis	C	1
39852	M05734	Neisseria meningitidis	C	1
39857	M14217	Neisseria meningitidis	C	1
39858	M19586	Neisseria meningitidis	C	1
39865	M21374	Neisseria meningitidis	C	1
39866	M21427	Neisseria meningitidis	C	1
39867	M21428	Neisseria meningitidis	C	1
39868	M21432	Neisseria meningitidis	C	1
39869	M21714	Neisseria meningitidis	C	1
39870	M21716	Neisseria meningitidis	C	1
39871	M21717	Neisseria meningitidis	C	1
39872	M21718	Neisseria meningitidis	C	1
39873	M22057	Neisseria meningitidis	C	1
39874	M22327	Neisseria meningitidis	C	1
39875	M22900	Neisseria meningitidis	C	1
39876	M23763	Neisseria meningitidis	C	1
39877	M26924	Neisseria meningitidis	C	1
39878	M26925	Neisseria meningitidis	C	1
39879	M26926	Neisseria meningitidis	C	1
39880	M26919	Neisseria meningitidis	C	1
39881	M24930	Neisseria meningitidis	C	1
39882	M25670	Neisseria meningitidis	C	1
39883	M26294	Neisseria meningitidis	C	1
39884	M26295	Neisseria meningitidis	C	1
39885	M26296	Neisseria meningitidis	C	1
39886	M26931	Neisseria meningitidis	C	1
39888	M26948	Neisseria meningitidis	C	1
39889	M26949	Neisseria meningitidis	C	1
39890	M26927	Neisseria meningitidis	C	1
39891	M25953	Neisseria meningitidis	C	1
39892	M26017	Neisseria meningitidis	C	1
39893	M26263	Neisseria meningitidis	C	1
39895	M25941	Neisseria meningitidis	C	1
39896	M27267	Neisseria meningitidis	C	1
39897	M26059	Neisseria meningitidis	C	1
39898	M26089	Neisseria meningitidis	C	1
39899	M25964	Neisseria meningitidis	C	1
39900	M26087	Neisseria meningitidis	C	1
39901	M26088	Neisseria meningitidis	C	1
39903	M26416	Neisseria meningitidis	C	1
39940	LNP28306	Neisseria meningitidis	C	1
39941	LNP28314	Neisseria meningitidis	C	1
39966	LNP27364	Neisseria meningitidis	B	1
40015	LNP27501	Neisseria meningitidis	B	1
40020	LNP27512	Neisseria meningitidis	B	1
40032	LNP27546	Neisseria meningitidis	B	1
40062	LNP27615	Neisseria meningitidis	B	1
40065	LNP27626	Neisseria meningitidis	B	1
40103	LNP27439	Neisseria meningitidis	B	1
40132	LNP27587	Neisseria meningitidis	B	1
40164	LNP27389	Neisseria meningitidis	B	1
40167	LNP27275	Neisseria meningitidis	B	1
40173	LNP27272	Neisseria meningitidis	B	1
40190	LNP27451	Neisseria meningitidis	B	1
40192	LNP27306	Neisseria meningitidis	B	1
40202	LNP27684	Neisseria meningitidis	C	1
40220	LNP28284	Neisseria meningitidis	C	1
40239	LNP28303	Neisseria meningitidis	C	1
40243	LNP28309	Neisseria meningitidis	W	1
40262	LNP28332	Neisseria meningitidis	W	1
40267	LNP28337	Neisseria meningitidis	C	1
40268	LNP28338	Neisseria meningitidis	C	1
40272	LNP28342	Neisseria meningitidis	B	1
40274	LNP28344	Neisseria meningitidis	C	1
40276	LNP28346	Neisseria meningitidis	C	1
40278	LNP28348	Neisseria meningitidis	C	1
40279	LNP28349abd	Neisseria meningitidis	W	1
40293	LNP28126	Neisseria meningitidis	C	1
40298	2581	Neisseria meningitidis	W	1
40316	M15 240907	Neisseria meningitidis	W	1
40318	M15 240909	Neisseria meningitidis	NG	1
40322	M15 240852	Neisseria meningitidis	W	1
40337	2579	Neisseria meningitidis	B	1
40345	2638	Neisseria meningitidis	B	1
40349	2679	Neisseria meningitidis	B	1
40352	2682	Neisseria meningitidis	B	1
40354	2688	Neisseria meningitidis	B	1
40383	LNP28354	Neisseria meningitidis	C	1
40384	LNP28355	Neisseria meningitidis	B	1
40387	LNP28359abd	Neisseria meningitidis	W	1
40389	LNP28361	Neisseria meningitidis	C	1
40391	LNP28363	Neisseria meningitidis	W	1
40395	LNP28367	Neisseria meningitidis	C	1
40396	LNP28368	Neisseria meningitidis	C	1
40399	LNP28371	Neisseria meningitidis	W	1
40401	LNP28374	Neisseria meningitidis	W	1
40404	LNP28379	Neisseria meningitidis	B	1
[truncated: 61,932 more rows]
